# Supplementary material for: Universalized and robust length separation of carbon and boron nitride nanotubes with improved polymer depletion-based fractionation
Source: RSC Adv. 2024 Aug 28;14(35):25490–506. doi: 10.1039/d4ra01883d (PMC11353058; doi:10.1039/d4ra01883d)
Supplement: RA-014-D4RA01883D-s002 [file RA-014-D4RA01883D-s002.xlsx]

## Sheet: Arc
S_4			P_4,S_3			P_3*,S_1.5			P_1.5*,S_0.5			P_0.5*
Length (nm)	Step height (nm)	Scale (nm/px)	Length (nm)	Step height (nm)	Scale (nm/px)	Length (nm)	Step height (nm)	Scale (nm/px)	Length (nm)	Step height (nm)	Scale (nm/px)	Length (nm)	Step height (nm)	Scale (nm/px)
82.2	1.4	11.7	190.1	0.9	11.7	200.5	0.7	11.7	576.8	1.3	11.7	800.8	1.2	11.7
110.5	1.2	11.7	381.5	0.8	11.7	298.7	0.9	11.7	807.4	1	11.7	864.3	0.9	11.7
97.8	1.5	11.7	209.6	1.2	11.7	273.6	0.9	11.7	653.3	1.2	11.7	289.7	1.3	11.7
98.6	1.3	11.7	152.1	1.1	11.7	135.1	0.7	11.7	395.1	1.3	11.7	1062.2	1.1	11.7
113.5	1.6	11.7	289.2	1.2	11.7	246.9	0.9	11.7	443.2	0.9	11.7	877.3	0.9	11.7
106	1.5	11.7	348.5	1	11.7	232.4	0.9	11.7	185.1	1.1	11.7	953.7	1	11.7
113.5	1.6	11.7	133.7	1.7	11.7	303.6	0.9	11.7	248.1	1.4	11.7	792.2	2.7	11.7
80.1	1.5	11.7	250.1	1.2	11.7	223.9	0.8	11.7	717.9	1.3	11.7	235.3	1.2	11.7
109.3	1.3	11.7	157	0.9	11.7	172.8	0.9	11.7	320.8	1.3	11.7	676.6	1.1	11.7
99	1	11.7	145.8	1	11.7	162.7	0.8	11.7	387	1.2	11.7	712.4	1	11.7
170.5	1.2	11.7	150	1.1	11.7	231.2	0.9	11.7	245.1	1.4	11.7	340.1	1.1	11.7
99.8	1.3	11.7	131.6	0.8	11.7	299.6	1.4	11.7	235.3	1.1	11.7	583.8	0.8	11.7
133.6	0.9	11.7	213.2	0.9	11.7	220	0.9	11.7	397.9	0.9	11.7	205.3	1.4	11.7
195.5	1.2	11.7	234.6	0.7	11.7	364.1	0.7	11.7	232.8	1.1	11.7	926.6	0.7	11.7
171.9	1.6	11.7	171.7	1	11.7	313	0.8	11.7	425.2	1.5	11.7	835.6	1	11.7
131.6	1	11.7	105.4	0.7	11.7	406.6	0.8	11.7	663.7	1.5	11.7	537.3	1.1	11.7
109.6	1.3	11.7	91.5	1.5	11.7	448.3	1	11.7	312.5	0.9	11.7	406	1	11.7
139.8	1	11.7	178.8	1	11.7	287.8	0.7	11.7	228	1.6	11.7	213.2	1.2	11.7
133.4	1.7	11.7	109.9	1.6	11.7	128.9	0.9	11.7	809	0.7	11.7	792	1	11.7
149.2	1.5	11.7	314	1.4	11.7	339.9	0.7	11.7	264.8	1.1	11.7	878.3	0.6	11.7
123.3	1.4	11.7	200	1	11.7	223.1	1	11.7	349.3	1.3	11.7	530.8	1	11.7
79.5	1.2	11.7	190.1	0.8	11.7	124.4	0.6	11.7	531.2	1	11.7	808.9	0.9	11.7
433.6	0.9	11.7	258	1.1	11.7	274.8	1.1	11.7	437.9	1.6	11.7	801.2	0.9	11.7
211.5	1.1	11.7	224.7	1	11.7	138.1	0.8	11.7	383.6	1.2	11.7	693	1	11.7
149.6	1.1	11.7	191.3	0.9	11.7	290.4	0.7	11.7	385.8	1.1	11.7	979.7	1.3	11.7
126	1.2	11.7	154.6	1.3	11.7	417.9	0.9	11.7	678.1	0.7	11.7	873.5	1.1	11.7
99.6	1.5	11.7	168	0.9	11.7	336	1	11.7	303.5	0.8	11.7	406.2	1	11.7
107.6	1.5	11.7	142	1.1	11.7	268.5	1	11.7	681.5	1.6	11.7	200.1	1	11.7
77.3	1.6	11.7	148	1.1	11.7	526	0.7	11.7	428.2	1.1	11.7	354.6	0.9	11.7
140.1	1.5	11.7	426.9	0.8	11.7	327.6	0.8	11.7	785.4	0.9	11.7	855.9	0.9	11.7
125.7	0.9	11.7	170.6	1	11.7	443.4	0.7	11.7	723.3	1.6	11.7	153.7	1.1	11.7
176.1	1.5	11.7	315.8	1.3	11.7	172.2	0.8	11.7	569	0.9	11.7	404.9	1	11.7
165.4	1.2	11.7	144.7	1.1	11.7	513.9	0.7	11.7	460	1	11.7	199.6	1.2	11.7
215.6	1.1	11.7	197.2	1.2	11.7	376.6	4.2	11.7	142.1	2.1	11.7	358.1	1	11.7
131	1.5	11.7	189.5	1.3	11.7	330.3	1.2	11.7	359.6	1	11.7	229.5	0.8	11.7
104.2	1.6	11.7	160.3	1.1	11.7	234.1	0.9	11.7	395.9	1	11.7	1150.8	0.7	11.7
131.9	1.4	11.7	206	1.2	11.7	290.2	1.4	11.7	718.9	5.8	11.7	644.5	1	11.7
113.2	0.8	11.7	255.6	1	11.7	350.7	2.3	11.7	658.3	1.2	11.7	851	1.1	11.7
105.4	1.4	11.7	118.3	0.7	11.7	162.8	1	11.7	736.2	0.9	11.7	1164.7	0.9	11.7
159.2	1.5	11.7	194.8	1.5	11.7	284.3	0.7	11.7	683.1	0.8	11.7	1065.6	1.6	11.7
149.3	1.2	11.7	147.3	1	11.7	164.9	0.9	11.7	873.1	1.2	11.7	890	1.5	11.7
307.1	1.2	11.7	186.3	0.9	11.7	347.4	0.8	11.7	424.4	1.8	11.7	206.9	1.2	11.7
125.4	1.5	11.7	150.5	0.8	11.7	179.2	0.8	11.7	538.1	1.2	11.7	101.4	1.1	11.7
107.1	1.3	11.7	186.2	0.7	11.7	303.7	0.8	11.7	235	0.7	11.7	582.4	1	11.7
84.4	1.4	11.7	211.7	0.9	11.7	285.2	1	11.7	771.3	0.8	11.7	675.3	13	11.7
103	1.8	11.7	207.5	1.2	11.7	222.5	0.8	11.7	566.5	0.9	11.7	167	6	11.7
176.2	1.2	11.7	118.2	1.2	11.7	327.4	0.9	11.7	415	1.1	11.7	981.4	0.8	11.7
183.1	1.4	11.7	284.6	1.2	11.7	345.6	0.9	11.7	282.5	1	11.7	508.6	1	11.7
135.3	1.3	11.7	134	1.2	11.7	153.2	1	11.7	325.7	1	11.7	329.3	0.9	11.7
132.1	1.1	11.7	169.8	1.5	11.7	128.9	0.6	11.7	581	0.9	11.7	639.4	1.3	11.7
96.8	0.6	11.7	130.4	1.5	11.7	279.2	0.9	11.7	1003.8	1.3	11.7	1101	1	11.7
90	1.4	11.7	116.6	0.9	11.7	299.7	1.3	11.7	664.7	1	11.7	862.7	0.9	11.7
144.6	1.2	11.7	86.4	1.2	11.7	393.5	1.6	11.7	691.7	1	11.7	1074.5	0.9	11.7
78.5	1.5	11.7	149.5	1.5	11.7	156	0.7	11.7	288.2	1.2	11.7	312.9	0.9	11.7
78	1	11.7	165	1.4	11.7	172.1	0.9	11.7	567.6	0.7	11.7	630.7	1	11.7
88.1	1.6	11.7	45.6	4.7	11.7	308	1	11.7	445	0.9	11.7	608.6	0.6	11.7
116.5	1.5	11.7	163	1.4	11.7	364.1	1.1	11.7	118.2	2.4	11.7	622.4	0.8	11.7
104.6	1.8	11.7	127.7	1.2	11.7	191.4	1.1	11.7	700.6	1.6	11.7	1234.4	0.9	11.7
178.6	1.5	11.7	173	1.1	11.7	265.6	0.9	11.7	472.7	1.1	11.7	792.4	0.9	11.7
93.7	1.1	11.7	136.1	0.8	11.7	349.2	1	11.7	854.9	1	11.7	259.3	1.8	15.6
102.7	1.4	11.7	153.1	1.4	11.7	271	0.7	11.7	710.7	0.7	11.7	623.7	1	15.6
135.5	1.3	11.7	162.4	1	11.7	181.8	0.7	11.7	704.1	1	11.7	260.6	1.1	15.6
136.6	1.5	11.7	193.5	1.4	11.7	270	1	11.7	733.2	0.7	11.7	298	1	15.6
95.1	0.9	11.7	202.4	0.8	11.7	387.2	0.9	11.7	441	1.2	11.7	181.1	1.3	15.6
126.2	1	11.7	144.5	1	11.7	483	1.2	11.7	353.6	1.3	11.7	404.6	0.8	15.6
209.4	1	11.7	181.3	1.2	11.7	554.4	0.9	11.7	435.8	1.2	11.7	173.2	1.9	15.6
110.4	0.7	11.7	263.4	1.3	11.7	206.6	0.9	11.7	449	1	11.7	816.4	0.7	15.6
104.2	1	11.7	149.5	1.1	11.7	73.9	0.7	11.7	462.6	1.1	11.7	829.8	0.8	15.6
22.9	2.1	11.7	212.1	1.3	11.7	251.6	0.9	11.7	265.1	1.3	11.7	934.7	1.5	15.6
134.8	1.6	11.7	257.4	1.5	11.7	277.2	0.8	11.7	459.6	1	11.7	695.8	1	15.6
173	0.9	11.7	119.2	1.3	11.7	305.2	0.9	11.7	391.9	2.2	11.7	230.3	1.1	15.6
131.1	0.8	11.7	138.4	0.9	11.7	246	0.8	11.7	395.9	1.4	11.7	972.8	0.8	15.6
204.4	0.7	11.7	255.9	1.3	11.7	498.6	0.7	11.7	418.1	1.8	11.7	1001.5	0.9	15.6
146.8	0.7	11.7	108	1	11.7	490.6	1.3	11.7	659.3	0.9	11.7	769.5	0.8	15.6
174.7	1.3	11.7	97.3	1.4	11.7	309.3	0.7	11.7	284	1.4	11.7	614.3	0.8	15.6
128.5	1.4	11.7	169	1.3	11.7	327.9	0.8	11.7	211.5	1.7	11.7	1187.8	0.8	15.6
93.4	1.3	11.7	218.1	1.5	11.7	269.4	0.9	11.7	545.4	1.2	11.7	1289.3	1.3	15.6
124.1	1	11.7	127.9	0.8	11.7	218.4	1	11.7	494.3	1.1	11.7	355.6	1.6	15.6
208.2	0.7	11.7	172	0.9	11.7	187.3	1	11.7	322.3	1	11.7	666.2	1	15.6
109.4	1.2	11.7	184.8	1.4	11.7	295.5	1	11.7	399.6	1.4	11.7	181	0.9	15.6
106.9	0.8	11.7	128	1	11.7	222.5	1.4	11.7	877.2	1.1	11.7	272.5	1.2	15.6
97.5	0.7	11.7	125.9	1	11.7	337.4	0.8	11.7	132.1	1.9	11.7	598.5	1	15.6
121.5	0.9	11.7	147.4	0.8	11.7	260.3	1	11.7	134.8	1.5	11.7	444.8	0.8	15.6
117.6	0.9	11.7	133.1	1.1	11.7	268.6	0.9	11.7				714.9	0.9	15.6
195.3	0.9	11.7	252.1	1.5	11.7	583.1	0.8	11.7				730.5	1	15.6
108.6	1.2	11.7	177	0.8	11.7	176.1	1.1	11.7				557	0.8	15.6
251.9	0.8	11.7	223	0.8	11.7	336.5	0.9	11.7				855.8	1.1	15.6
142.2	0.8	11.7	157.7	1.1	11.7	306	1.2	11.7				203.5	0.8	15.6
107.3	1.2	11.7	148.6	1.2	11.7	428.4	1.4	11.7				61.6	3.5	15.6
144.5	1.1	11.7	186.5	0.9	11.7	295.3	1	11.7				139.3	0.5	15.6
106.8	1	11.7	262.9	1	11.7	197.6	1.4	11.7				591.8	0.8	15.6
98.8	1.2	11.7	160.9	1	11.7	226.1	1.2	11.7				823.1	0.8	15.6
153.5	1.4	11.7	205.2	1	11.7	469.7	0.9	11.7				280.4	1.2	15.6
112.1	1.1	11.7	157.4	0.8	11.7	264.9	1	11.7				969.8	0.8	15.6
98.5	1	11.7	144	0.9	11.7	171.1	1	11.7				741	0.7	15.6
199.5	0.9	11.7	380.2	0.9	11.7	160.5	0.9	11.7				495.9	1.3	15.6
206.1	0.9	11.7	174.1	1	11.7	280.2	1	11.7				938.6	0.9	15.6
114.7	1.2	11.7	282.3	1	11.7	329.3	0.7	11.7				1078.3	0.8	15.6
127.6	0.7	11.7	132	1.2	11.7	242.9	0.8	11.7				714.5	0.8	15.6
335.9	1.1	11.7	251.8	1	11.7	359.4	1.1	11.7				547	6.6	15.6
279.9	0.8	11.7	121.4	0.8	11.7	469.2	0.9	11.7				682.3	0.9	15.6
361.5	1.2	11.7	137.7	1.2	11.7	329.4	3.8	11.7				834	0.6	15.6
407.1	0.9	11.7	287.3	0.8	11.7	292.1	0.7	11.7				285.4	0.6	15.6
127.5	1.3	11.7	267	0.9	11.7	340.8	0.8	11.7				326.9	1	15.6
103.4	1	11.7	488.7	1	11.7	219.7	0.7	11.7				595	0.9	15.6
140.3	1.3	11.7	129.3	1.4	11.7	238.4	1	11.7				191.6	0.8	15.6
131	1	11.7	165.1	0.9	11.7	176.4	0.7	11.7				558.1	1.2	15.6
94.4	1.1	11.7	158.3	1	11.7	226.1	0.7	11.7				1191.8	0.9	15.6
146.6	1.5	11.7	242.6	1.2	11.7	331.5	1.1	11.7				344.2	1.1	15.6
133.4	1.4	11.7	256.7	0.9	11.7	220.1	1.2	11.7				763.1	5.8	15.6
126.3	0.7	11.7	212.8	1.1	11.7	176.2	0.9	11.7				638.8	0.8	15.6
206.5	1.2	11.7	185.7	1	11.7	203.6	0.8	11.7				767.3	1.1	15.6
137	1	11.7	172.1	0.9	11.7	279	1	11.7				536.5	0.8	15.6
124.2	0.7	11.7	192.9	0.7	11.7	168.1	1.2	11.7				933.9	0.8	15.6
137	0.8	11.7	211.3	1.2	11.7	88.9	0.7	11.7				845.1	1.1	15.6
112.2	1	11.7	99.4	1	11.7	393.2	1	11.7				298.3	0.8	15.6
102.2	1.2	11.7	230	1.2	11.7	272.3	1.6	11.7				1338.4	0.6	15.6
107.7	0.8	11.7	118.1	1	11.7	234.7	1.6	11.7				517.2	1.3	15.6
148.1	1.3	11.7	143.2	1.1	11.7	235.3	0.8	11.7				989.1	1.1	15.6
120.5	1	11.7	304.5	0.9	11.7	408.6	1.8	11.7				1547.4	0.7	15.6
154.6	1.2	11.7	117.2	2.1	11.7	206.4	2.3	11.7				1084.7	1	15.6
109.1	1.3	11.7	123.2	1.1	11.7	243.4	0.8	11.7				972.2	0.9	15.6
158.4	0.9	11.7	317	1	11.7	397.7	0.9	11.7				592.9	0.8	15.6
92.3	0.8	11.7	131.2	0.7	11.7	123.8	1.5	11.7				1051.6	0.7	15.6
147.5	1.2	11.7	354.4	1.2	11.7	404.6	0.7	11.7				1020.9	1	15.6
109.5	0.9	11.7	104.9	0.4	11.7	284.6	1	11.7				499.8	0.7	15.6
107.9	1.2	11.7	100	1.6	11.7	158.2	1.1	11.7				738.9	0.9	15.6
123.2	1.8	11.7	107.9	1.3	7.8	281.8	1.5	11.7				394.3	3	15.6
93	1	11.7	153	1.6	7.8	248.5	1	11.7				789.5	0.9	15.6
248.9	1.2	11.7	170.6	1.6	7.8	214.5	1.1	11.7				1146.2	0.6	15.6
261.5	1.2	11.7	153.6	1	7.8	192.3	0.6	11.7				894.8	0.9	15.6
182.5	1.5	11.7	133.1	1.4	7.8	165.5	0.7	11.7				470.4	2.2	15.6
446	1.2	11.7	169.1	1.3	7.8	215.1	1	11.7				1003.4	1.1	15.6
86.5	0.8	11.7	172.2	1.6	7.8	237.5	1.1	11.7				909.3	0.9	15.6
160.1	0.7	11.7	143.4	1.4	7.8	225.4	1	11.7				1123.5	0.7	15.6
174.7	0.9	11.7	191.8	1.3	7.8	284	0.9	11.7				974.8	1.3	15.6
99.4	1	11.7	216.9	1.5	7.8	163.6	1.2	11.7				629.8	1.1	15.6
130.2	1.1	11.7	222.9	1.5	7.8	248.9	1.1	11.7				173.2	2.5	15.6
81.1	1.4	11.7	92.1	1.4	7.8	299.8	0.8	11.7				928	0.9	15.6
136.6	1.3	11.7	159	1.1	7.8	225.6	1.1	11.7				1041.7	0.9	15.6
53.3	1	11.7	133.6	1.3	7.8	291.1	0.8	11.7				273.9	1.1	15.6
93.6	1.2	11.7	71.5	1.2	7.8	292.7	0.9	11.7				227.5	1.3	15.6
172.3	1.1	11.7	120	0.9	7.8	417.6	0.6	11.7				1059.8	0.9	15.6
98.9	0.8	11.7	225.4	1.8	7.8	275.3	0.8	11.7				1046.6	0.8	15.6
87.7	0.8	11.7	163.3	1.7	7.8	189.8	0.9	11.7				874.9	1	15.6
97	1.2	11.7	170.5	1.2	7.8	229.9	1.2	11.7				276.3	0.6	15.6
144	0.7	11.7	213.1	1.6	7.8	180.3	1.5	11.7				870.6	0.9	15.6
96.6	0.9	11.7	90.7	0.7	7.8	190.5	0.8	11.7				878.2	1.2	15.6
165.7	1	11.7	118.1	1.7	7.8	157.6	1.1	11.7				1092.9	1.1	15.6
162.5	0.8	11.7	241.2	1	7.8	328.7	1.2	11.7				1139.8	1	15.6
165.3	1	11.7	219.6	1.2	7.8	409.6	0.9	11.7				222.7	1.4	15.6
92.6	1	11.7	144.9	1.1	7.8	547.5	0.9	11.7				184	0.7	15.6
77.4	1	11.7	151.4	1.4	7.8	219.1	1.1	11.7				320	0.9	15.6
117.7	1	11.7	79.7	2.9	7.8	89.4	1.2	11.7				305.7	0.7	15.6
141.9	0.9	11.7	141.4	1.4	7.8	236.9	0.9	11.7				629.6	1.3	15.6
383.1	1.3	11.7	127.2	5.1	7.8	288.2	1.3	11.7				756.6	0.8	15.6
140.9	0.8	11.7	151.9	1	7.8	128.1	2.1	11.7				1043.5	1.1	15.6
179.5	1.2	11.7	147.7	1	7.8	271	0.9	11.7				922.8	0.6	15.6
148	1	11.7	179.8	1.4	7.8	258.4	1	11.7				524	2.8	15.6
135.8	1.2	11.7	116.2	0.8	7.8	485.6	0.9	11.7				731.3	0.8	15.6
120.6	0.8	11.7	150.3	1.3	7.8	567.2	0.9	11.7				594.8	0.8	15.6
92.5	1.2	11.7	94.9	1.1	7.8	208.9	1.1	11.7				316.4	0.7	15.6
233.4	1.2	11.7	141.6	1.4	7.8	170.6	1	11.7				1029.8	0.9	15.6
133.4	1.5	11.7	140.6	1.3	7.8	254.3	1.5	11.7				595.8	0.8	15.6
156.2	1.4	11.7	152	1.7	7.8	230.1	1	11.7				531.6	0.7	15.6
189.9	1.3	11.7	163.4	1.5	7.8	437.7	1.3	11.7				624.7	1.1	15.6
118.8	1.5	11.7	339.6	2.2	7.8	351.7	1	11.7				997.8	0.8	15.6
126.2	1.5	11.7	166.6	2.6	7.8	218.3	0.9	11.7				895.3	0.9	15.6
263.9	1.2	11.7	107.4	1.2	7.8	317	0.9	11.7				468	1.2	15.6
134.7	1.8	11.7	127.2	1.9	7.8	131.4	1.4	11.7				979.3	0.7	15.6
101.9	1.4	11.7	140.4	2	7.8	192.4	1	11.7				807.6	1.2	15.6
96.2	1.6	11.7	174.4	1.6	7.8	220.1	0.9	11.7				1067.9	1.2	15.6
102.7	2.2	11.7	123	1.5	7.8	385.3	0.8	11.7				865.3	1	15.6
97.3	1.8	11.7	295.8	1.3	7.8	121.2	1.4	11.7				527.6	1.3	15.6
198.8	1.7	11.7	175.3	1.3	7.8	167.4	1	11.7				535.7	1.5	15.6
137.2	0.8	11.7	169.3	1.7	7.8	127.7	1.2	11.7				781.1	0.9	15.6
98.7	1.4	11.7	152.5	0.9	7.8	283.9	1.2	11.7				478.8	1.2	15.6
106.6	1.4	11.7	130.2	1.8	7.8	269.4	1	11.7				877	0.6	15.6
90.4	1.4	11.7	132.3	1.6	7.8	159	1	11.7				927.6	0.7	15.6
105.3	1.7	11.7	162.9	0.8	7.8	316.1	1.5	11.7				652.7	0.6	15.6
103.2	1.6	11.7	133.8	1.1	7.8	708.4	0.8	11.7				1022.1	1.2	15.6
177.9	0.9	11.7	122.1	1.2	7.8	464.5	1	11.7				508.7	1.2	15.6
105.8	1.5	11.7	220.7	1	7.8	258.8	1	11.7				936.3	0.8	15.6
117.6	1.4	11.7	143.7	0.9	7.8	300.8	0.9	11.7				834.1	0.9	15.6
174	1.5	11.7	126.3	1.5	7.8	179	0.9	11.7				655.6	0.8	15.6
95.8	1.1	11.7	156.9	0.8	7.8	288.2	0.9	11.7				700.4	0.9	15.6
104.5	1.3	11.7	107.4	0.8	7.8	171.4	0.9	11.7				748.4	1.6	15.6
138.6	1.2	11.7	140.9	1.5	7.8	202.4	1.1	11.7				311.8	1	15.6
102.1	1.3	11.7	134.3	1.2	7.8	295.8	1	11.7				668.5	0.5	15.6
96.4	2	11.7	222	1.4	7.8	464.2	1.2	11.7				553.1	0.5	15.6
110.2	1.3	11.7	157	1.8	7.8	215.8	1.1	11.7				345.1	0.7	15.6
78.3	1.4	11.7	162.2	1.5	7.8	128.1	1.1	11.7				1022.7	0.7	15.6
124.3	1.3	11.7	351.3	1	7.8	203.6	0.8	11.7				695.3	0.6	15.6
147.5	1.3	11.7	183.4	1.6	7.8	223.6	0.9	11.7				652.5	1.1	15.6
120	1.3	11.7	372.2	1.5	7.8	263.8	1.2	11.7				577	1.2	15.6
171.2	1.4	11.7	660.6	1.4	7.8	421	1.8	11.7				747	0.9	15.6
67.8	1.4	11.7	153.6	1.2	7.8	117	0.9	11.7				907.9	1.2	15.6
101.9	1.2	11.7	137.1	1	7.8	611.6	0.9	11.7				841.8	1.3	15.6
122.4	1.3	11.7	199.5	0.7	7.8	227.2	1	11.7				572.1	0.8	15.6
111.4	1.1	11.7	201.2	1.3	7.8	274.6	1	11.7				725.6	1.1	15.6
206.1	1.3	11.7	190.4	1.6	7.8	264.2	0.8	11.7				493	1	15.6
254.5	1.4	11.7	127	1.5	7.8	383.6	1	11.7				908.5	1.2	15.6
112.1	2.2	11.7	255.2	0.5	7.8	190.1	1.2	11.7				795.6	0.7	15.6
156.4	2.1	11.7	182	1.6	7.8	355.3	1.1	11.7				822.5	0.8	15.6
108.8	1.6	11.7	166.9	1.4	7.8	315.8	0.9	11.7				1160.1	0.7	15.6
89.8	2.1	11.7	195.2	1.7	7.8	233.3	1.4	11.7				753	1.3	15.6
127.7	1.5	11.7	128.8	1.8	7.8	323	1.1	11.7				1268.6	0.7	15.6
180	1.6	11.7	152.4	1.4	7.8	241.6	1.4	11.7				179.4	1.3	15.6
203.3	1	11.7	143	1.4	7.8	213.1	0.9	11.7				705.9	0.8	15.6
111.5	1.3	11.7	126.3	1.3	7.8	479.6	0.9	11.7				917.7	0.6	15.6
272.8	1.3	11.7	150.2	1.7	7.8	264.4	0.9	11.7				978.6	1.1	15.6
418.5	1	11.7	138.9	1.5	7.8	645.9	0.8	11.7				806.6	0.7	15.6
161.8	1.9	11.7	185	1.6	7.8	310.6	1	11.7				731.9	0.9	15.6
198.2	1.2	11.7	109.5	0.6	7.8	184.9	1	11.7				195.3	1.2	15.6
128	1.5	11.7	84.7	0.7	7.8	194.4	1	11.7				162.9	1	15.6
147.2	1.1	11.7				171.2	1.1	11.7				835.7	1	15.6
125.8	1.2	11.7				298	0.9	11.7				361.3	1.3	15.6
131.7	1	11.7				177.2	1.1	11.7				678.4	1.1	15.6
132.1	0.6	11.7				385.4	1.1	11.7				697.1	1.1	15.6
125	1.5	11.7				185.6	0.7	11.7				446.2	0.8	15.6
253.8	1.4	11.7				176.3	1.1	11.7
213.9	1.5	11.7				281	0.9	11.7
83.1	1.4	11.7				124.5	1	11.7
80.2	1.7	11.7				213.7	0.7	11.7
123	0.9	11.7				262.8	1	11.7
134.7	1.3	11.7				412.1	0.7	11.7
162.8	1.4	11.7				378.8	0.9	11.7
135.7	1.7	11.7				315.5	1	11.7
267.3	1.3	11.7				356.7	0.9	11.7
116.8	1.2	11.7				159.7	0.9	11.7
161.5	1.4	11.7				347	0.9	11.7
112.1	1.5	11.7				176.3	0.8	11.7
110.4	1.4	11.7				310.9	1	11.7
112.5	1.3	11.7				136	1.2	11.7
226.9	1	11.7				213.2	0.8	11.7
127.3	0.7	11.7				370.1	1.1	11.7
84.5	0.9	11.7				261.7	1.4	11.7
151.4	2	11.7				185.8	1.4	11.7
101	1.9	11.7				212.1	1.3	11.7
100.3	1.3	11.7				250.6	1	11.7
158.4	1.4	11.7				163.7	0.8	11.7
81.6	1	11.7				245.4	1.1	11.7
135.3	1	11.7				220.2	0.9	11.7
96.3	1.6	11.7				321.1	1.4	11.7
85.3	1.2	11.7				221	1.1	11.7
83.9	1.3	11.7				283.7	1.3	11.7
148.6	1.3	11.7				147.4	1.2	11.7
113.6	1.6	11.7				302.9	1.3	11.7
100.5	1.4	11.7				252.3	1.2	11.7
176.9	1.6	11.7				260.6	1.5	11.7
80.5	1.3	11.7				209	1.2	11.7
94.5	1.4	11.7				290.4	1	11.7
113.9	1.2	11.7				332.4	1	11.7
146.1	1.7	11.7				350	1.3	11.7
77.4	1.3	11.7				190.3	1.2	11.7
71.8	1.6	11.7				263.5	1.5	11.7
81.6	1.4	7.8				415.8	1.8	11.7
182.2	1.4	7.8				253	1.3	11.7
67.3	1.2	7.8				404.1	1.7	11.7
49	1	7.8				279.3	1.9	11.7
85.5	1.3	7.8				371.5	1.8	11.7
117.4	1.8	7.8				180.5	0.8	11.7
117.6	1.4	7.8				247.3	1.1	11.7
107.2	1.7	7.8				171.3	1.3	11.7
222.9	1.3	7.8				304.4	1.3	11.7
125.6	1.3	7.8				216.4	1.4	11.7
109.2	1.6	7.8				319.4	1.1	11.7
62.5	1.3	7.8				542.7	0.9	11.7
148.5	1.7	7.8				242.5	0.8	11.7
170.7	1.1	7.8				320.4	0.9	11.7
130	2.2	7.8				243.2	0.9	11.7
115.8	1.3	7.8				188	0.8	11.7
91.6	1.7	7.8				391.6	1.8	11.7
104	1.8	7.8				338.2	1.8	11.7
32.7	1.6	7.8				227.4	1.3	11.7
174	1.2	7.8				247.3	1.7	11.7
82.6	1.4	7.8				176.3	1.7	11.7
120.6	1.2	7.8				434.8	1.6	11.7
104.2	2	7.8				285.1	2	11.7
135.8	1.5	7.8				305.5	1	11.7
144.6	1.6	7.8				186.7	1.2	11.7
76.3	1.3	7.8				264.6	1.4	11.7
128.3	1.7	7.8				196	0.9	11.7
134.9	1.8	7.8				227.6	0.8	11.7
132.3	1.5	7.8				400.1	1.4	11.7
116.6	1.7	7.8				181.1	1.6	11.7
171.5	1.3	7.8				213.2	2	11.7
172.8	1.2	7.8				157.2	2.1	11.7
247	1.8	7.8				244.1	1	11.7
87.3	1.2	7.8				587	1.3	11.7
62.9	1.6	7.8				418.6	1.8	11.7
105.3	1.3	7.8				170.1	1.9	11.7
88.1	1.8	7.8				641.8	1.5	11.7
119.4	1.3	7.8				253.8	2.1	11.7
154	0.8	7.8				355.2	1.5	11.7
102.9	1.3	7.8				353.5	1.7	11.7
199.3	1.5	7.8				367.1	1.7	11.7
100.8	1.6	7.8				171.8	1.3	11.7
91.8	1.3	7.8				282.4	2	11.7
145.3	1.6	7.8				245.5	1.3	11.7
144.3	0.9	7.8				285.4	0.7	11.7
133.4	1.5	7.8				329.1	1.4	11.7
64.1	1.1	7.8				312.8	0.7	11.7
59.5	1.1	7.8				357.5	1.2	11.7
108	1.7	7.8				199.2	1.6	11.7
140.8	1.4	7.8				319	1.6	11.7
129.8	1.9	7.8				270.4	1	11.7
76.8	1.4	7.8				101.6	3.2	11.7
113.6	1.5	7.8				247.9	1.2	11.7
107.2	1.5	7.8				172	1.5	11.7
90.5	1.2	7.8				239.9	1.2	11.7
73.5	1.9	7.8				227	0.8	11.7
107.5	0.5	7.8				223.3	0.7	11.7
72.8	1.5	7.8				388.7	1.1	11.7
63.1	1.9	7.8				332.8	1.5	11.7
140.8	1.2	7.8				260.6	1.4	11.7
128.8	1.9	7.8				281.8	0.8	11.7
112.3	1.3	7.8				202.3	0.5	11.7
75.2	1.6	7.8				272.8	0.9	11.7
105.3	2.1	7.8				163.8	0.7	11.7
172.8	0.9	7.8				276.5	0.9	11.7
53.4	1.7	7.8				274.5	0.7	11.7
146.8	1.7	7.8				170.1	3.5	11.7
71.3	1.3	7.8				239.6	0.6	11.7
64.2	1.4	7.8				164.8	0.5	11.7
59.8	1.5	7.8				153.5	1.1	11.7
111.1	1.1	7.8				187.2	0.7	11.7
60	1.1	7.8				426.7	0.6	11.7
89	1.3	7.8				235.3	0.9	11.7
69.5	1.4	7.8				158.6	0.6	11.7
120.2	1.6	7.8				203.8	0.6	11.7
159.8	1.8	7.8				468.5	0.7	11.7
99.6	1.2	7.8				153	1.1	11.7
103.4	0.8	7.8				134	0.7	11.7
70.4	0.8	7.8				192.2	0.6	11.7
49.6	1.9	7.8				305.9	2.7	11.7
135.6	1	7.8				222.7	1.1	11.7
240.3	1.5	7.8				152.1	0.7	11.7
83.3	1.4	7.8				169	0.8	11.7
109	1.1	7.8				176.9	0.7	11.7
84.3	1.5	7.8				269.9	0.9	11.7
140.4	1.8	7.8				520.4	0.8	11.7
84.5	1.7	7.8				232.9	0.8	11.7
77.9	1.3	7.8				295.7	1	11.7
105.5	1.5	7.8				169.3	1	11.7
95.9	1.3	7.8				490.9	0.8	11.7
148.3	1.6	7.8				185.1	1.6	11.7
54	1.2	7.8				218.4	1	11.7
168.6	1.8	7.8				625	0.8	11.7
159.2	1.1	7.8				254	0.8	11.7
119.8	1.5	7.8				306.6	1.1	11.7
32	1.8	7.8				191.3	0.7	11.7
153.9	1.2	7.8				228.5	0.9	11.7
89.9	1.4	7.8				263.2	1	11.7
139	1.8	7.8				326.5	1.2	11.7
84	1.4	7.8				228.4	2	11.7
63.4	1.3	7.8				192.9	1.6	11.7
80.6	2.1	7.8				231.4	0.6	11.7
115.1	1.6	7.8				132	1	11.7
203.1	1	7.8				159.4	0.4	11.7
70.6	1.4	7.8				205.9	0.7	11.7
196.8	1.3	7.8				794	0.6	11.7
77.4	1.3	7.8				169.8	0.5	11.7
60.8	1.4	7.8				239	0.6	11.7
90.5	1.4	7.8				337.1	0.5	11.7
99.5	0.7	7.8				191.1	0.7	11.7
94.2	1.9	7.8				238.7	0.5	11.7
96.4	0.9	7.8				228.7	0.8	11.7
59.3	1.2	7.8				206.4	0.7	11.7
101.6	1.1	7.8				375.1	1.1	11.7
102.6	1.5	7.8				298.9	0.7	11.7
87.3	2.5	7.8				344.8	0.9	11.7
63.6	1.2	7.8				237.1	0.7	11.7
117.9	1.6	7.8				492.4	0.7	11.7
54.3	1.3	7.8				303.3	0.8	11.7
166	2.1	7.8				475.9	0.7	11.7
46.2	1.5	7.8				170.9	0.7	11.7
58.7	1.4	7.8				225.2	1.1	11.7
55.9	0.9	7.8				459.1	1	11.7
53.1	1.4	7.8				131.8	0.9	11.7
59.8	1.3	7.8				241.8	0.9	11.7
68.3	1.2	7.8				334.1	1.7	11.7
165.8	1.3	7.8				268.9	0.7	11.7
102.3	1.7	7.8				248.5	1.1	11.7
126.1	1.1	7.8				179.5	0.7	11.7
112.7	1.1	7.8				317.3	0.9	11.7
79.5	2.1	7.8				201.2	1	11.7
104.1	1.8	7.8				217.7	1.2	11.7
127.5	1.6	7.8				193.9	0.8	11.7
84	1.6	7.8				255.2	1.1	11.7
320.3	1.2	7.8				239.6	0.7	11.7
74	1.8	7.8				240	1.1	11.7
101.5	1.2	7.8				261	0.6	11.7
93.5	1.2	7.8				260.1	0.8	11.7
131.3	1.6	7.8				289.2	1.1	11.7
110.7	2	7.8				266	1	11.7
125.1	1.2	7.8				220.4	0.9	11.7
167.5	1.7	7.8				216.9	0.7	11.7
103.2	1.7	7.8				589	1	11.7
107.6	1.7	7.8				283.9	0.8	11.7
63.4	1.7	7.8				201.2	0.7	11.7
105.6	1.8	7.8				316.1	1.1	11.7
75.9	1.5	7.8				217.3	1	11.7
79.4	1.5	7.8				322.4	0.7	11.7
100	1.3	7.8				207.8	0.8	11.7
81.9	1.6	7.8				189.7	0.7	11.7
78	1.6	7.8				150.3	2.6	11.7
68.7	1.4	7.8				225.1	1.3	11.7
81.4	1.3	7.8				247.9	1.1	11.7
473.6	1	7.8				263.7	0.8	11.7
226.6	1.6	7.8				229.6	0.6	11.7
120.9	1.8	7.8				222	0.7	11.7
109.2	1.5	7.8				207.8	1	11.7
79.9	1.8	7.8				116.2	2.8	11.7
92.5	1.5	7.8				266.2	0.7	11.7
71.8	1.7	7.8				178.5	1	11.7
72.9	1.8	7.8				245.3	0.9	11.7
90.8	2	7.8				103.2	0.7	11.7
95.7	1.7	7.8				156.6	0.7	11.7
90.2	1.5	7.8				235.1	1.2	11.7
77.1	1.3	7.8				191.2	0.8	11.7
105.5	1.2	7.8				280.7	1.1	11.7
160.5	1.1	7.8				262.8	1.1	11.7
67.5	0.5	7.8				272.5	1	11.7
66	1.6	7.8				232.5	0.8	11.7
101	0.8	7.8				229.8	0.6	11.7
131.6	1.2	7.8				209.5	0.9	11.7
149.1	1.3	7.8				125.5	0.9	11.7
93.3	1.3	7.8				220.9	1	11.7
105.5	1.4	7.8				159.4	1.2	11.7
123.9	2.4	7.8				455.9	0.6	11.7
61.1	1.8	7.8				373.4	1.2	11.7
82.4	1.4	7.8				293.3	1	11.7
73	1.5	7.8				243.1	0.9	11.7
94.9	1.5	7.8				272.9	0.6	11.7
90.2	2.1	7.8				311.9	0.5	11.7
50.1	1.3	7.8				227	1.3	11.7
76.4	0.9	7.8				290.1	0.7	11.7
80.2	1.3	7.8				257.4	0.9	11.7
115.3	0.7	7.8				143.8	1.3	11.7
68.9	1.3	7.8				199.1	0.7	11.7
199	2	7.8				232.7	0.6	11.7
161.8	2.1	7.8				170.4	0.8	11.7
86.7	0.9	7.8				217.8	0.7	11.7
89.2	1.3	7.8				240.8	0.8	11.7
74.8	1.6	7.8				176.9	0.8	11.7
111.4	1.3	7.8				188.4	1.6	11.7
112.4	1.6	7.8				202.1	0.7	11.7
93.3	1.9	7.8				119.3	0.7	11.7
134.2	1.2	7.8				288.8	0.7	11.7
82.5	1.3	7.8				175.6	0.9	11.7
187.2	1.3	7.8				188.9	0.8	11.7
174	1.1	7.8				164.6	1.3	11.7
136.6	1.3	7.8				281.2	0.9	11.7
112.4	1.1	7.8				221.3	0.7	11.7
98.9	2.3	7.8				206.7	0.7	11.7
155.7	1.1	7.8				291.5	0.7	11.7
95.5	1.1	7.8				140.5	0.5	11.7
95.5	1.5	7.8				185.5	0.9	11.7
130.9	1.3	7.8				235.2	0.7	11.7
87.2	1.8	7.8				233.2	0.9	11.7
160.6	1.5	7.8				244.3	0.9	11.7
104.8	1.3	7.8				345.5	0.7	11.7
78.3	1.4	7.8				239.2	1	11.7
63.3	2.1	7.8				165.7	0.5	11.7
114.5	1.4	7.8				275.3	0.9	11.7
84.9	1.7	7.8				134.9	0.7	11.7
147	1	7.8				412.3	0.6	11.7
81.8	2.2	7.8				318.2	1.7	11.7
101	1.4	7.8				263.9	1	11.7
92.1	0.9	7.8				189.4	1	11.7
84.9	1.4	7.8				166.2	0.9	11.7
133.2	1.6	7.8				259.9	0.8	11.7
288.9	1	7.8				212.6	0.8	11.7
117.4	1.4	7.8				224.5	0.7	11.7
127.7	1.5	7.8				278.9	0.9	11.7
75.2	2	7.8				233.8	1.2	11.7
102.6	1.1	7.8				172.1	0.9	11.7
189.1	1.7	7.8				223	0.7	11.7
122	1.7	7.8				144	0.6	11.7
81.8	1.2	7.8				181.5	0.6	11.7
117.3	1.5	7.8				318.7	0.5	11.7
96.5	1.4	7.8				335.9	1.1	11.7
502.8	1.3	7.8				190.2	0.9	11.7
76.3	1.5	7.8				99.9	0.7	11.7
116.1	1.5	7.8				216.7	2.1	11.7
117.3	1.3	7.8				113.3	0.5	11.7
136.6	1.4	7.8				120.7	0.5	11.7
157.4	1.5	7.8				253.6	0.6	11.7
150.3	1	7.8				261.9	0.6	11.7
81.4	1.2	7.8				196.5	0.8	11.7
86.9	1.3	7.8				252	1.3	11.7
143.3	1.3	7.8				282.4	0.8	11.7
138.9	1.7	7.8				261	0.8	11.7
76.2	1.5	7.8				214.3	0.8	11.7
209	1.3	7.8				205.6	0.6	11.7
91.2	1.1	7.8				96.3	0.5	11.7
76	1.6	7.8				162.2	0.7	11.7
105.8	1.3	7.8				260.6	0.5	11.7
34.3	5	7.8				244.4	0.8	11.7
103.3	1.1	7.8				160.9	1.2	11.7
96.5	1.3	7.8				174.4	1.3	11.7
79.8	1.4	7.8				292.2	0.7	11.7
96.5	0.8	7.8				201.9	0.9	11.7
93.5	2.1	7.8				234	0.5	11.7
103.9	1.5	7.8				183.2	0.8	11.7
116.1	1.7	7.8				251	0.7	11.7
134.2	1.4	7.8				201.1	0.8	11.7
80.9	1.2	7.8				232.4	0.7	11.7
121.7	1.9	7.8				214.5	0.7	11.7
63.4	1	7.8				394.5	0.9	11.7
85.9	1.5	7.8				229.3	0.8	11.7
474.3	1	7.8				403.9	0.7	11.7
121.2	1.3	7.8				250.3	1	11.7
86	1.2	7.8				182.9	0.8	11.7
114.1	1.7	7.8				168.8	0.9	11.7
115.9	1.3	7.8				187.8	0.9	11.7
77.6	1.4	7.8				420.9	1	11.7
144.3	1.3	7.8				240.9	0.9	11.7
99.4	1	7.8				369.6	1.3	11.7
59	1.7	7.8				423.9	1	11.7
74.3	1.7	7.8				362.2	1.2	11.7
74.3	2	7.8				182.2	1	11.7
96.6	1.1	7.8				220.4	0.7	11.7
112.8	0.9	7.8				279.3	0.8	11.7
82.3	1.5	7.8				134.2	0.9	11.7
106.8	1	7.8				214.6	1.1	11.7
99.4	0.6	7.8				575.8	0.7	11.7
89.7	1	7.8				183.1	0.8	11.7
161.9	0.8	7.8				281.5	1.1	11.7
143.5	1.1	7.8				156	0.7	11.7
94.4	0.5	7.8				204.2	0.7	11.7
148.6	1	7.8				155.2	0.7	11.7
73.3	1.1	7.8				183.1	0.8	11.7
203.2	1.1	7.8				117.7	0.5	11.7
68.4	1.4	7.8				163.7	0.6	11.7
115.3	1.2	7.8				170.2	0.5	11.7
217.9	0.9	7.8				519.5	0.6	11.7
249.3	0.6	7.8				328.7	0.8	11.7
110.9	0.9	7.8				145.4	0.7	11.7
75	0.7	7.8				172.8	1	11.7
100.8	1.2	7.8				182.3	0.8	11.7
99.4	1	7.8				180	1.2	11.7
116.4	1	7.8				159.5	0.6	11.7
98.4	1.4	7.8				149.2	1	11.7
133	1.3	7.8				146.1	0.4	11.7
92.8	1.3	7.8				186.8	0.6	11.7
84.9	1.5	7.8				188.9	0.7	11.7
72.8	1	7.8				396.2	1.3	11.7
97.5	1.2	7.8				215.4	0.8	11.7
50.5	0.5	7.8				303.2	0.7	11.7
190	0.9	7.8				152.2	0.4	11.7
99.6	1.1	7.8				275.7	0.8	11.7
149.9	1.3	7.8				142.6	0.9	11.7
89.6	1.4	7.8				235.4	0.7	11.7
83.4	1.1	7.8				225.2	0.7	11.7
124.8	1	7.8				235.4	1.2	11.7
140.9	1.2	7.8				515.7	0.6	11.7
131.5	1.2	7.8				135.5	0.8	11.7
88.3	1.3	7.8				214.1	1.2	11.7
152.9	0.8	7.8				319.7	1.1	11.7
132.2	1.1	7.8				276.3	1.1	11.7
120.5	1	7.8				251.3	0.7	11.7
131.6	1	7.8				338	0.9	11.7
98.9	1.6	7.8				387.3	0.9	11.7
108.2	1.1	7.8				327.7	0.7	11.7
153.8	1.4	7.8				223.8	1	11.7
114	0.8	7.8				171.2	1	11.7
329.2	1.5	7.8				245.8	1.5	11.7
107.7	1.2	7.8				178.2	1.4	11.7
86.3	1.2	7.8				108.1	1.2	11.7
80.1	1.4	7.8				225.6	1.3	11.7
138	1.4	7.8				99.2	0.7	11.7
130.3	1.3	7.8				237.4	1	11.7
116.3	1.3	7.8				224.7	0.8	11.7
109.6	1	7.8				603	0.7	11.7
120.5	0.9	7.8				262.4	0.8	11.7
115.9	1.5	7.8				302	1.5	11.7
70.3	1.2	7.8				182.3	0.9	11.7
68.4	1.4	7.8				363.8	1.6	11.7
81.2	1.4	7.8				170.1	0.9	11.7
108.9	1.4	7.8				191.6	0.8	11.7
140.6	1.3	7.8				258.8	1.2	11.7
55.2	3	7.8				234.4	0.8	11.7
139.6	1.1	7.8				256.2	0.6	11.7
107.1	1.5	7.8				173.6	0.8	11.7
92.8	1.3	7.8				186	0.7	11.7
106	1.3	7.8				203.6	1.1	11.7
93	1.1	7.8				168.7	1.1	11.7
116.6	0.9	7.8				321.6	0.8	11.7
130.3	1.1	7.8				248.5	1.2	11.7
92.2	1.4	7.8				415.9	0.8	11.7
153.4	1.6	7.8				176.8	1.2	11.7
113.1	0.9	7.8				286.7	1.1	11.7
87.3	1.4	7.8				292.7	0.9	11.7
112	1.4	7.8				178.7	1.9	11.7
164.6	0.9	7.8				41.7	4.8	11.7
117.5	1.7	7.8				550.5	1.4	11.7
93.9	1.6	7.8				138.9	0.8	11.7
99	1.4	7.8				311.4	0.9	11.7
116.4	1.4	7.8				158.9	0.9	11.7
99.8	1.6	7.8				237.3	0.9	11.7
104.9	1.2	7.8				245.6	1	11.7
122.8	1.1	7.8				90.9	0.8	11.7
133.7	1.3	7.8				169.2	1.5	11.7
119.2	1.2	7.8				331.3	1.3	11.7
134.2	1.4	7.8				618.9	0.7	11.7
105.3	1	7.8				234.2	0.6	11.7
101.5	1	7.8				229.5	1	11.7
127.7	1.3	7.8				307.6	0.6	11.7
125.3	1.2	7.8				431.3	1.4	11.7
62.5	1.8	7.8				242.6	1	11.7
102.9	1.6	7.8				167.7	0.8	11.7
150.3	1	7.8				313.4	1	11.7
77.7	1.1	7.8				321	0.8	11.7
62.4	1	7.8				198.9	1.1	11.7
63.3	1.2	7.8				150.4	0.7	11.7
72.6	1.2	7.8				223.8	1.1	11.7
71.9	1.4	7.8				162.6	0.9	11.7
69.8	1	7.8				236	1.1	11.7
108.4	1.6	7.8				191.9	0.7	11.7
62.7	1.1	7.8				248.6	1.3	11.7
71.4	1.3	7.8				253.9	1.3	11.7

## Sheet: FCVD
S_3			P_3,S_2			P_2*,S_1			P_1*,S_0.5
Length (nm)	Step height (nm)	Scale (nm/px)	Length (nm)	Step height (nm)	Scale (nm/px)	Length (nm)	Step height (nm)	Scale (nm/px)	Length (nm)	Step height (nm)	Scale (nm/px)
283.2	5.1	11.7	276.3	1	11.7	758	1.1	11.7	1022.8	0.7	19.5
160.5	1	11.7	221	1.2	11.7	597.3	1.4	11.7	699.3	1.3	19.5
92.7	1.1	11.7	173.2	1.2	11.7	166.8	1.2	11.7	654.6	1	19.5
100.6	1.1	11.7	169.6	0.6	11.7	622.3	0.8	11.7	724.8	1.4	19.5
102.7	0.9	11.7	321.8	1.1	11.7	234.3	1.1	11.7	746.8	0.9	19.5
129.5	0.4	11.7	95.7	0.6	11.7	416.8	1.1	11.7	767.1	1.6	19.5
264.2	0.8	11.7	136	1.2	11.7	703.7	1	11.7	311.3	1.3	19.5
437.9	1.1	11.7	307.3	1.3	11.7	395.4	1.4	11.7	457.6	1.8	19.5
131.5	1	11.7	80.6	1	11.7	454.5	0.9	11.7	917.7	0.9	19.5
383.4	1.5	11.7	235	1.6	11.7	588.3	0.9	11.7	866.9	0.8	19.5
211.3	1	11.7	338.1	1	11.7	387.2	1	11.7	825.9	0.7	19.5
100.6	0.4	11.7	221.3	1.2	11.7	625.3	1.2	11.7	593.4	1.1	19.5
214.1	0.7	11.7	391.6	0.9	11.7	403	1.1	11.7	675.8	0.9	19.5
91.3	1	11.7	879.9	1.5	11.7	391.2	0.8	11.7	592.6	0.9	19.5
341.4	1	11.7	80.4	1.7	11.7	629.1	0.8	11.7	702.6	0.7	19.5
197.9	0.6	11.7	288.3	1.5	11.7	588.7	0.8	11.7	789.7	0.8	19.5
94.6	1.1	11.7	174.7	1	11.7	397.6	0.8	11.7	532.3	1.3	19.5
115	0.9	11.7	722.9	1.6	11.7	291.2	1	11.7	593.9	1.1	19.5
123.6	0.8	11.7	319.1	1	11.7	836.8	1	11.7	546.4	1.1	19.5
229.6	1	11.7	295.1	0.9	11.7	308.1	1	11.7	779.6	0.7	19.5
150.4	1.1	11.7	254.3	1.1	11.7	546.5	1.1	11.7	647.2	0.8	19.5
131.6	1.1	11.7	254.9	1.6	11.7	593.7	0.8	11.7	817.8	0.8	19.5
340.6	1	11.7	256.3	1.3	11.7	391.9	1.3	11.7	803.8	0.9	19.5
137.9	1.6	11.7	176.5	1.6	11.7	555.8	0.7	11.7	1015.7	0.9	19.5
242.6	0.6	11.7	185.6	0.6	11.7	712.2	2.7	11.7	481	0.9	19.5
284.1	1.4	11.7	285.1	1.1	11.7	290.1	0.9	11.7	458.6	0.8	19.5
219.5	0.8	11.7	111.3	1.4	11.7	211.4	0.7	11.7	1136.6	0.9	19.5
155.5	0.9	11.7	329.1	1	11.7	476.3	0.8	11.7	616.8	0.9	19.5
253	1.2	11.7	416.2	1.1	11.7	214.5	0.9	11.7	856.4	2.1	19.5
139.4	1.2	11.7	418.7	1.1	11.7	190.2	0.9	11.7	658.7	0.8	19.5
432.7	0.7	11.7	249.9	2.1	11.7	1142.6	0.8	11.7	992.3	0.8	19.5
215.6	1.1	11.7	232.6	0.9	11.7	179.4	1.9	11.7	1106.6	0.9	19.5
219	1.3	11.7	242.8	1.2	11.7	278.7	1.6	11.7	1017.1	0.7	19.5
190.5	1	11.7	532.2	1.4	11.7	209.3	1	11.7	511.5	0.8	19.5
229.5	1.1	11.7	301.1	1	11.7	269.1	0.8	11.7	349.1	1.2	19.5
99.4	0.9	11.7	263.6	1.9	11.7	544.5	0.8	11.7	586.5	1	19.5
140.1	0.9	11.7	590.3	1.2	11.7	358.8	0.7	11.7	818.9	1.1	19.5
251.1	0.9	11.7	273.8	1.1	11.7	242.2	0.8	11.7	581	0.9	19.5
106.3	1.5	11.7	255.5	1.2	11.7	406.3	2.9	11.7	619.7	1	19.5
269.6	1.1	11.7	943.3	1.2	11.7	569.1	1	11.7	447.8	1	19.5
266.2	0.8	11.7	547.7	2.9	11.7	291.4	1.4	11.7	774.6	0.8	19.5
183.7	1.5	11.7	200	1.2	11.7	316.6	0.7	11.7	566.4	0.9	19.5
135.6	0.8	11.7	273	1.4	11.7	422.6	1.7	11.7	579.5	0.8	19.5
165	1	11.7	308.9	1.1	11.7	801	1.3	11.7	648.7	0.8	19.5
153.6	0.8	11.7	298.8	1.1	11.7	469.9	1.5	11.7	494.7	0.7	19.5
188.7	1.1	11.7	420.4	1.2	11.7	418.3	7.3	11.7	581.7	1	19.5
153.3	1.3	11.7	259	1.7	11.7	266	1.2	11.7	556.3	1.4	19.5
167.7	0.7	11.7	307.8	1.3	11.7	588.9	6.2	11.7	677.9	0.8	19.5
87.3	2.2	11.7	306.6	1.2	11.7	726.4	0.8	11.7	641.9	1.1	19.5
150.5	1.2	11.7	285.8	1.5	11.7	365.7	1	11.7	458.2	0.9	19.5
129.6	0.8	11.7	223.9	1.3	11.7	738	0.6	11.7	588.1	0.8	19.5
287.1	1.1	11.7	205.4	0.9	11.7	974.5	0.6	11.7	640.2	0.8	19.5
134.4	1.1	11.7	203	1	11.7	450.9	0.9	11.7	867.4	1.1	19.5
171.8	1.9	11.7	245.9	1.3	11.7	300.5	1.1	11.7	599	1	19.5
207.4	1	11.7	373.9	2.4	11.7	238.7	1.3	11.7	583.2	0.7	19.5
181.4	1.3	11.7	155.7	1.5	11.7	416.6	1.7	11.7	487.6	0.7	19.5
41.9	10.7	11.7	168.9	1.3	11.7	235.2	0.9	11.7	1058.1	0.7	19.5
161.5	0.7	11.7	286.4	1.2	11.7	315.4	1	11.7	832.3	1.6	19.5
116.1	0.9	11.7	436	1.4	11.7	201.1	0.7	11.7	703.2	1.1	19.5
246.4	6.6	11.7	311.9	0.9	11.7	593.4	1.6	11.7	615.5	2.1	19.5
120.5	1	11.7	321.8	0.9	11.7	542.1	1.1	11.7	963.7	1.2	19.5
220.9	1	11.7	473	0.5	11.7	310.7	1.6	11.7	515.4	0.9	19.5
190.1	1.2	11.7	265.6	1.2	11.7	730.9	1.5	11.7	618	1	19.5
262	4.8	11.7	254.6	0.7	11.7	573.3	1.2	11.7	536	0.8	19.5
162.9	1	11.7	267.6	0.9	11.7	283.5	1	11.7	654.1	0.9	19.5
189.8	0.7	11.7	367.1	2.7	11.7	158.3	1.5	11.7	754.7	1	19.5
135.5	1.3	11.7	227.7	8	11.7	341	1.8	11.7	458.2	0.7	19.5
268.4	0.7	11.7	174.9	0.8	11.7	391.8	1.3	11.7	561.4	1	19.5
204.2	0.8	11.7	424.5	0.8	11.7	633.8	1.3	11.7	1182.1	0.8	19.5
164	1.2	11.7	335.7	0.9	11.7	280.6	1.5	11.7	453	0.9	19.5
115.9	0.9	11.7	213	0.7	11.7	479.5	1.3	11.7	383.1	1.2	19.5
229.8	1.1	11.7	205.1	1.1	11.7	604.8	1.2	11.7	838.8	1.2	19.5
169.3	1.1	11.7	248.6	1	11.7	383.9	1.5	11.7	493.9	0.8	19.5
157.7	0.9	11.7	588.9	1.1	11.7	449	1.6	11.7	586.1	0.9	19.5
142.3	0.5	11.7	868.5	1.4	11.7	369.4	1.7	11.7	267.9	1.5	11.7
189	5.8	11.7	188.5	0.8	11.7	396.8	1.8	11.7	440.1	1	11.7
255.4	1.1	11.7	311.5	0.9	11.7	491.9	1.4	11.7	556.7	1.2	11.7
78.4	0.7	11.7	173.3	1.5	11.7	321.2	1.1	11.7	648.6	1.4	11.7
357.7	1.4	11.7	373	0.8	11.7	366.2	1.1	11.7	1100.2	0.9	11.7
151.6	0.7	11.7	244.6	0.7	11.7	438.4	1.1	11.7	471.8	1	11.7
270.5	1	11.7	298	0.9	11.7	393	1.5	11.7	329.7	0.9	11.7
211.3	3.8	11.7	236.7	0.7	11.7	567.8	1.4	11.7	547.8	1.5	11.7
152.3	3.2	11.7	266.4	1.1	11.7	141.4	1.8	11.7	274.3	0.9	11.7
170.6	0.7	11.7	378.9	1.1	11.7	343.5	1	11.7	495.5	1.6	11.7
188.1	0.9	11.7	755.6	1.3	11.7	468.5	1.2	11.7	493.7	1.6	11.7
252.2	1.1	11.7	196.4	0.6	11.7	1116.7	1.4	11.7	431.3	1.1	11.7
182.4	0.9	11.7	726.1	1.5	11.7	302.5	1.1	11.7	310	1.2	11.7
529.2	0.8	11.7	235.1	0.6	11.7	852.2	2.5	11.7	113.9	1.2	11.7
234.2	0.6	11.7	366.1	1.2	11.7	1066.4	1	11.7	333.6	1.2	11.7
671.7	0.7	11.7	374.3	1.4	11.7	448.8	1	11.7	191.9	1.2	11.7
525.2	1.5	11.7	198	1	11.7	316.2	1.7	11.7	215.3	5.5	11.7
269.5	0.5	11.7	222	0.7	11.7	523.9	1.4	11.7	422.2	0.7	11.7
237.5	1	11.7	258.1	5	11.7	206.4	1.2	11.7	351.2	1.4	11.7
286	0.8	11.7	254.8	0.7	11.7	301.5	1.1	11.7	514.7	1.1	11.7
230.8	0.8	11.7	317.1	1.2	11.7	303.1	1.6	11.7	755.5	1.1	11.7
270.5	9.4	11.7	154	1.1	11.7	344.9	1.2	11.7	159.7	1.7	11.7
270.7	0.6	11.7	164.6	0.8	11.7	707.4	2.2	11.7	337.9	0.9	11.7
381.4	0.9	11.7	261.2	1.4	11.7	512.5	1.2	11.7	192.4	1.4	11.7
154	1.4	11.7	262.6	1.2	11.7	543.1	1.2	11.7	666.7	1.2	11.7
202	1.5	11.7	215.4	4.3	11.7	511.9	1.5	11.7	128.9	2	11.7
107.3	1.2	11.7	240	1.1	11.7	203.7	1.5	11.7	236.7	0.9	11.7
179.4	4	11.7	198.7	0.8	11.7	340.2	1.5	11.7	228.6	1.2	11.7
145	1.5	11.7	302.7	0.9	11.7	478.5	1.5	11.7	174.4	0.9	11.7
143	2.5	11.7	183.4	4.3	11.7	395.8	1.7	11.7	151.4	1	11.7
113.7	1.5	11.7	128.2	2.5	11.7	228.1	1.2	11.7	1075.1	1.3	11.7
150.3	1	11.7	184.8	1.3	11.7	593.3	1.4	11.7	360.3	1.2	11.7
160.9	0.9	11.7	540.2	7.5	11.7	1075.6	1.4	11.7	506.7	0.8	11.7
260.6	0.6	11.7	298	1.1	11.7	402.3	1.8	11.7	656.8	2.1	11.7
291.6	0.7	11.7	229.4	2.4	11.7	498.9	1.1	11.7	987	1.8	11.7
165.1	0.8	11.7	132	0.7	11.7	573.4	1.1	11.7	167.2	1.7	11.7
225	0.8	11.7	361.8	1.5	11.7	233.1	1.7	11.7	283	0.9	11.7
189.9	0.7	11.7	361	2.8	11.7	255.8	2.1	11.7	134.3	0.7	11.7
165.2	0.7	11.7	174.4	1.6	11.7	621.5	1.3	11.7	284.6	0.9	11.7
171.6	0.8	11.7	313	1.5	11.7	148	1.7	11.7	523.5	1.7	11.7
142.4	0.8	11.7	357	1	11.7	402.9	1.2	11.7	350.5	1.1	11.7
340	1.1	11.7	440.1	0.9	11.7	251.2	1.4	11.7	769.9	1	11.7
226.7	1.4	11.7	248.6	2.2	11.7	230.1	1.5	11.7	622.6	1.3	11.7
173.8	1.2	11.7	162.7	1.3	11.7	496.5	1.1	11.7	805.2	2.2	11.7
174	1	11.7	177	1.6	11.7	253.5	1.5	11.7	162	1	11.7
134.9	0.8	11.7	348.9	1.3	11.7	494.4	1.1	11.7	536.8	1	11.7
169.1	0.7	11.7	207.3	11.7	11.7	458.9	1.4	11.7	222	1	11.7
206.4	1.3	11.7	201.4	0.9	11.7	212.8	1.5	11.7	1605	1.3	11.7
311.6	1.3	11.7	219.2	0.9	11.7	594.4	1.3	11.7	1026.3	1.4	11.7
227.2	1.2	11.7	159.4	1.1	11.7	969.7	1.5	11.7	1190.9	1.3	11.7
483.7	1.3	11.7	439.2	1	11.7	544.3	1.3	11.7	476.2	1.3	11.7
265.8	0.9	11.7	267.9	0.8	11.7	78.7	1.4	11.7	505.5	0.9	11.7
143.5	0.7	11.7	243	1.1	11.7	326.3	1.3	11.7	227.5	0.9	11.7
153.6	1	11.7	155.2	2.5	11.7	332.6	0.9	11.7	196.2	0.8	11.7
120.7	0.9	11.7	241.3	1.2	11.7	344.9	1.7	11.7	105.5	1.3	11.7
167.8	1.3	11.7	195.7	1.6	11.7	719.7	1.6	11.7	979.6	0.9	19.5
190.7	0.9	11.7	282.5	1	11.7	263.8	1.2	11.7	1178.5	0.6	19.5
200.3	4.9	11.7	244.1	2.2	11.7	238.9	6.2	11.7	805.6	0.9	19.5
253.2	0.8	11.7	596	1.8	11.7	573.7	1.6	11.7	1028.5	0.8	19.5
204.1	0.4	11.7	253.2	1.1	11.7	362.6	1	11.7	942.1	1.1	19.5
200	1	11.7	220.3	1.7	11.7	434.1	1.2	11.7	350	1.3	19.5
183.2	1.1	11.7	199.4	1.5	11.7	561.7	1.4	11.7	533.1	0.9	19.5
102.6	1.2	11.7	628.1	10	11.7	300.6	1.2	11.7	587.4	1	19.5
186.3	0.9	11.7	343.7	1.7	11.7	406.9	1.5	11.7	948.4	0.9	19.5
231.4	0.9	11.7	197.6	1.4	11.7	2056.1	1.6	11.7	753.1	1	19.5
183.2	0.8	11.7	750.4	2	11.7	566.1	1.5	11.7	413	0.8	19.5
228.1	0.9	11.7	150.1	1.1	11.7	551.8	2.1	11.7	339.8	0.9	19.5
194.1	0.7	11.7	295.5	1.1	11.7	679.4	1.2	11.7	808.4	0.9	19.5
211.8	1.1	11.7	376.7	1.4	11.7	234.9	1.2	11.7	826.6	1.1	19.5
265.6	0.9	11.7	576.5	1	11.7	349.8	2.2	11.7	350.8	1.5	19.5
153.6	0.9	11.7	673.5	1.9	11.7	584.8	1.3	11.7	543.3	0.9	19.5
140.7	1.7	11.7	252.4	1.1	11.7	477.2	1.4	11.7	433.7	0.9	19.5
151.7	1.1	11.7	236.2	1.8	11.7	652.4	1.2	11.7	654.6	0.8	19.5
202.6	0.9	11.7	372.6	1.8	11.7	720.9	0.7	11.7	725.4	0.6	19.5
198.6	0.8	11.7	229.6	1.8	11.7	378	1.3	11.7	1182.4	0.6	19.5
249.9	0.7	11.7	552.8	1.4	11.7	398	1.2	11.7	734.5	1.3	19.5
239.9	0.8	11.7	266.5	1.4	11.7	716.3	1.2	11.7	407	1.2	19.5
237.9	1.3	11.7	182.8	1	11.7	310.4	1.5	11.7	518.6	0.8	19.5
282.1	1.3	11.7	134.6	3.1	11.7	426.4	0.8	11.7	1248.5	0.8	19.5
323	1.4	11.7	171.5	1.7	11.7	422.8	1.2	11.7	598.7	1	19.5
143.4	1	11.7	231.7	1.5	11.7	691.4	1.7	11.7	745.1	0.9	19.5
104.2	1.1	11.7	264.3	1.6	11.7	294.5	1.3	11.7	621.7	0.7	19.5
266.8	1.2	11.7	383.7	1.2	11.7	754.9	2	11.7	725.9	0.4	19.5
164.8	1.1	11.7	284.6	1	11.7	402.5	0.9	11.7	320.1	1.4	19.5
165.3	1	11.7	294.5	0.9	11.7	389	1.3	11.7	394.7	1.2	19.5
201.3	1	11.7	261.2	1.5	11.7	408.2	1.7	11.7	320.2	0.9	19.5
169.1	1.3	11.7	258.1	1.3	11.7	559.5	1.3	11.7	391.1	0.7	19.5
93.3	1.4	11.7	218.3	1.3	11.7	325.5	1.2	11.7
166.7	1.3	11.7	618	1.5	11.7	641.5	1.3	11.7
242.7	1	11.7	204.5	1.3	11.7	470.3	1.6	11.7
168.3	1.5	11.7	300	1.3	11.7	337.7	1.3	11.7
163.3	1.8	11.7	263.8	1.1	11.7	237	0.8	11.7
274.8	1.1	11.7	326.9	1.2	11.7	192.5	1.4	11.7
157.3	0.8	11.7	300.7	1.5	11.7	708	1.4	11.7
271.2	1.5	11.7	461	1.5	11.7	599.5	1.1	11.7
208.8	1.4	11.7	174.2	1.5	11.7	628.2	1.2	11.7
183.9	1	11.7	313.5	1.1	11.7	363.8	2.9	11.7
282.1	1.3	11.7	215.8	1.8	11.7	331.8	1.2	11.7
245.8	2.3	11.7	153.3	1.1	11.7	306.9	1.1	11.7
254	1.1	11.7	1366.8	1.6	11.7	588.1	0.8	11.7
108.6	1.9	11.7	107.9	1	11.7	505.4	1	11.7
162.3	1.7	11.7	206.6	1.7	11.7
125.3	1.7	11.7	297.9	1.7	11.7
271	1	11.7	286.1	1.1	11.7
208.5	1.7	11.7	194	1.4	11.7
116.4	1.3	11.7	138.6	1.1	11.7
121.8	2.1	11.7	261.8	1.1	11.7
135.7	1.4	11.7	178	1.6	11.7
202.7	2	11.7	288.3	1.4	11.7
165.7	1.7	11.7	129.2	3.9	11.7
181.5	1.5	11.7	172.3	1.3	11.7
189.2	1.1	11.7	178.8	1.2	11.7
218	1.4	11.7	227.9	1.4	11.7
197.2	0.9	11.7	193	1	11.7
223.2	1.3	11.7	251.4	1.3	11.7
			554.3	1.9	11.7
			195.5	1.9	11.7
			312	5.7	11.7
			187.2	1.3	11.7

## Sheet: SG
S_4			P_4,S_3			P_3*,S_2			P_2*,S_1			P_1*
Length (nm)	Step height (nm)	Scale (nm/px)	Length (nm)	Step height (nm)	Scale (nm/px)	Length (nm)	Step height (nm)	Scale (nm/px)	Length (nm)	Step height (nm)	Scale (nm/px)	Length (nm)	Step height (nm)	Scale (nm/px)
474.2	0.8	19.5	245.2	0.7	19.5	224.4	1.3	19.5	593.4	0.7	19.5	1214.5	0.6	19.5
118.8	1.2	19.5	222.9	1.2	19.5	229.3	0.7	19.5	1079.9	0.6	19.5	1035.6	0.9	19.5
190.6	4.2	19.5	286	0.8	19.5	390.9	0.9	19.5	478	0.7	19.5	1033.5	0.9	19.5
155.1	0.9	19.5	289.6	0.6	19.5	297	0.7	19.5	348.8	0.4	19.5	645.7	0.6	19.5
240.8	1.5	19.5	370.3	0.6	19.5	362	1.4	19.5	623.7	0.7	19.5	1189.5	10.5	19.5
286.5	0.9	19.5	369.6	1.2	19.5	194.9	1.4	19.5	1349.7	0.8	19.5	1275.4	12.7	19.5
123.4	4.3	19.5	136.4	1.6	19.5	377.8	0.7	19.5	1114	0.5	19.5	747.5	0.6	19.5
305.4	1	19.5	279.5	0.8	19.5	331.1	0.8	19.5	517.2	0.6	19.5	1697.9	1.2	19.5
132.1	0.6	19.5	256.5	1	19.5	343.3	0.8	19.5	679.1	0.8	19.5	1296.1	0.8	19.5
203.2	0.7	19.5	324.7	0.9	19.5	275.4	0.6	19.5	524.8	1	19.5	700.4	0.9	19.5
121	1.1	19.5	296.9	0.9	19.5	275.8	0.9	19.5	625	0.6	19.5	550.2	1.1	19.5
143.4	1	19.5	353.3	0.9	19.5	883.7	0.6	19.5	992.3	0.6	19.5	872.3	3	19.5
159	0.7	19.5	145	1.2	19.5	320.6	0.9	19.5	558.4	0.6	19.5	663.5	4.3	19.5
180.2	0.6	19.5	243.1	1.2	19.5	448.9	0.9	19.5	222.6	0.4	19.5	687.3	1	19.5
201.2	0.7	19.5	264.2	0.6	19.5	294.7	1.3	19.5	341.5	0.6	19.5	548	0.8	19.5
214.5	0.6	19.5	234	0.6	19.5	223.1	0.8	19.5	855	0.5	19.5	658.9	0.7	19.5
176.6	0.9	19.5	238.9	0.9	19.5	311.4	1	19.5	831.5	0.6	19.5	926.8	0.9	19.5
256.1	0.9	19.5	212.5	1.2	19.5	368.9	0.7	19.5	846.7	0.5	19.5	467.1	0.6	19.5
115.7	1.4	19.5	224.3	0.7	19.5	378.4	0.7	19.5	402.5	0.8	19.5	593.5	0.8	19.5
124.4	1	19.5	208.6	0.6	19.5	290.7	1.9	19.5	284.8	0.7	19.5	701.4	8.8	19.5
142.9	0.7	19.5	315.8	1	19.5	294.7	1.2	19.5	630	0.5	19.5	869.3	0.8	19.5
138.7	0.5	19.5	288.1	1.1	19.5	376.7	0.9	19.5	564.7	0.7	19.5	760.1	0.7	19.5
179.6	0.7	19.5	224	1.6	19.5	236.1	0.7	19.5	338.5	0.8	19.5	581.5	1.4	19.5
417.2	0.8	19.5	308.1	0.7	19.5	354	0.6	19.5	570.8	0.6	19.5	1470.2	5.2	19.5
159.9	0.4	19.5	308.3	1	19.5	479.9	0.8	19.5	465.1	0.7	19.5	637.5	2.4	19.5
236.9	0.9	19.5	283.9	0.8	19.5	331.1	0.8	19.5	623.3	0.6	19.5	478	0.9	19.5
117.7	1.5	19.5	221.7	0.9	19.5	300.5	0.5	19.5	862.2	0.9	19.5	624	1.3	19.5
696.3	2.3	19.5	270	0.7	19.5	227.8	1	19.5	245.6	0.8	19.5	525.5	12.4	19.5
291.8	1.3	19.5	167	1.1	19.5	233.6	0.8	19.5	551.6	0.7	19.5	726.8	0.7	19.5
252.6	0.6	19.5	190.5	1.8	19.5	304	0.5	19.5	163.7	0.5	19.5	538.3	0.8	19.5
158.6	0.5	19.5	179.6	0.7	19.5	279.6	2.3	19.5	856.6	0.7	19.5	1206.8	0.5	19.5
234.5	0.5	19.5	138.3	0.9	19.5	250.5	1	19.5	421.6	0.7	19.5	582.2	1	19.5
316	0.7	19.5	233.7	3.8	19.5	461.5	0.7	19.5	443.3	0.7	19.5	831.2	0.6	19.5
145.8	0.8	19.5	502.2	0.6	19.5	229.4	0.5	19.5	681.2	0.6	19.5	662.8	0.6	19.5
232.8	1.2	19.5	293.6	0.4	19.5	320.6	0.6	19.5	882.4	0.7	19.5	660.3	1.5	19.5
125.9	1.2	19.5	212.3	0.8	19.5	252.5	0.6	19.5	390.5	1	19.5	904	0.5	19.5
257.6	0.4	19.5	266.8	0.8	19.5	328.7	0.3	19.5	339.9	0.6	19.5	1022.4	4.2	19.5
146.4	1.1	19.5	397.3	0.8	19.5	608.3	0.9	19.5	207.5	0.9	19.5	710.4	0.5	19.5
255.2	1.3	19.5	440.6	1.1	19.5	281.4	0.7	19.5	400.5	0.9	19.5	869.4	0.6	19.5
219.6	0.5	19.5	238.2	3.4	19.5	233.8	0.6	19.5	502	1	19.5	1799.8	0.7	19.5
229	0.8	19.5	277.9	1.1	19.5	621.5	0.5	19.5	677.4	0.7	19.5	479.1	0.6	19.5
429.8	1.2	19.5	213.5	1.1	19.5	260.4	0.4	19.5	648.2	0.7	19.5	617.3	0.5	19.5
184.5	0.8	19.5	182.9	1	19.5	256.2	0.8	19.5	694.4	0.5	19.5	896.4	0.6	19.5
243.4	1	19.5	276.9	1	19.5	637.8	1.2	19.5	416.5	0.5	19.5	951.7	0.5	19.5
198.3	0.9	19.5	198.8	1.3	19.5	267.3	0.9	19.5	568.1	0.6	19.5	529.4	0.5	19.5
134.7	1.2	19.5	250.5	1	19.5	260.6	0.9	19.5	511.1	0.6	19.5	605.4	0.4	19.5
148.7	1.7	19.5	315.5	0.8	19.5	372.7	0.5	19.5	208.7	0.9	19.5	788	0.5	19.5
226.2	0.8	19.5	185	1.5	19.5	238.8	1.4	19.5	994.1	0.4	19.5	473.3	0.5	19.5
401.7	1.4	19.5	274.9	0.8	19.5	194.6	0.4	19.5	1066.8	0.5	19.5	802.1	0.6	19.5
196.8	0.9	19.5	296.2	1	19.5	489.5	1	19.5	403.8	0.6	19.5	775.9	0.6	19.5
227.1	1.1	19.5	211.8	0.7	19.5	895.7	0.4	19.5	932.7	0.6	19.5	639.4	0.6	19.5
176.5	1	19.5	232.6	0.9	19.5	352.1	2.7	19.5	199.8	0.7	19.5	927.6	0.5	19.5
206.2	0.6	19.5	220.2	0.8	19.5	270.6	0.5	19.5	204.4	1	19.5	800.7	0.5	19.5
225.5	0.6	19.5	192.5	0.5	19.5	240	0.8	19.5	335.7	0.4	19.5	598.2	0.4	19.5
127.5	0.8	19.5	230.6	0.9	19.5	295.2	0.6	19.5	747.7	0.8	19.5	629.4	0.8	19.5
170.1	0.5	19.5	153.6	1.4	7.8	324.2	0.7	19.5	197.5	0.8	19.5	538.1	0.5	19.5
279.2	0.7	19.5	129.4	1.2	7.8	204.9	0.7	19.5	684.5	0.8	19.5	641.8	0.6	19.5
218.1	0.7	19.5	140.9	1.3	7.8	301.6	0.6	19.5	718.6	0.8	19.5	576	0.6	19.5
133.9	0.8	19.5	228.4	1.1	7.8	403.9	0.5	19.5	819.6	0.7	19.5	762.6	0.9	19.5
246.1	1.4	19.5	260.4	1.3	7.8	238.3	0.9	19.5	421.9	0.8	19.5	1019.7	0.6	19.5
366.2	0.3	19.5	197.2	1.1	7.8	332.7	0.4	19.5	234.4	0.5	19.5	915.8	0.5	19.5
196.8	1	19.5	178.6	1.5	7.8	233.8	0.3	19.5	401.6	0.8	19.5	812.2	0.8	19.5
302.7	0.8	19.5	288.6	1.4	7.8	214.1	0.6	19.5	314.5	0.9	19.5	1315.9	0.7	19.5
371.4	1.1	19.5	103.7	1.5	7.8	369	0.4	19.5	461.3	0.7	19.5	419.7	0.5	19.5
142.1	0.5	19.5	395.9	1.1	7.8	213.2	0.6	19.5	573.2	0.5	19.5	595.6	1.2	19.5
255.2	0.8	19.5	166.2	1.4	7.8	356.8	0.5	19.5	458.3	1	19.5	732	0.7	19.5
316.8	0.6	19.5	126.8	1.1	7.8	322.9	0.6	19.5	260.4	0.8	19.5	759.9	0.6	19.5
169.6	0.9	19.5	179.5	1.6	7.8	314.6	0.4	19.5	948.7	0.6	19.5	1164.5	0.8	19.5
229.9	1.2	19.5	195.2	0.5	7.8	241.6	0.8	19.5	961.7	0.6	19.5	620.4	0.8	19.5
249.3	1.1	19.5	190.8	1.3	7.8	260.3	0.4	19.5	410.2	0.6	19.5	528.7	0.5	19.5
141.7	0.5	19.5	150.5	1.5	7.8	236.6	0.3	19.5	342	1	19.5	452.8	0.7	19.5
239.9	0.9	19.5	139.6	1.2	7.8	115.7	1.1	7.8	469.6	0.6	19.5	1372.3	0.6	19.5
261.8	0.9	19.5	169.8	1.5	7.8	178.7	0.6	7.8	406.7	0.5	19.5	678.3	0.6	19.5
449.5	0.6	19.5	202.5	1.2	7.8	663.6	0.8	7.8	1030.6	0.8	19.5	1679.8	0.7	19.5
263.8	0.6	19.5	172.6	0.9	7.8	243	1.1	7.8	533.1	0.6	19.5	227.5	0.6	19.5
214.6	3.5	19.5	84	1.8	7.8	206.8	1	7.8	629.6	0.6	19.5	216.1	0.9	19.5
203.8	0.9	19.5	137	1.1	7.8	283.5	1.4	7.8	657.4	0.6	19.5	703.1	0.8	19.5
219.4	0.9	19.5	98.7	1.5	7.8	219.7	0.6	7.8	794.7	0.6	19.5	593.4	0.7	19.5
101	1.2	19.5	257.3	1.2	7.8	359.9	0.7	7.8	233.2	1	19.5	1212.4	0.8	19.5
202.2	0.9	19.5	181.7	1.3	7.8	395.1	0.7	7.8	427.6	0.8	19.5	812	0.8	19.5
142.3	0.6	19.5	145.6	1.9	7.8	291.8	1.1	7.8	276.7	0.8	19.5	995.7	0.6	19.5
282.9	0.6	19.5	87.9	1.8	7.8	274.8	0.7	7.8	395.5	0.9	19.5	515.5	0.7	19.5
226.7	0.7	19.5	167.5	0.9	7.8	175.2	0.6	7.8	542.3	0.7	19.5	974.2	0.7	19.5
193.3	0.9	19.5	125	1.5	7.8	191.6	1	7.8	449	0.8	19.5	565.7	1	19.5
147.3	1.3	19.5	141.4	1	7.8	152.1	0.6	7.8	398.7	0.8	19.5	310.9	0.9	19.5
243.5	0.6	19.5	204.9	1.3	7.8	401.6	2.1	7.8	490.1	0.8	19.5	707.2	0.7	19.5
192.7	0.5	19.5	191.8	1.4	7.8	193.4	0.4	7.8	983.7	0.6	19.5	1432.1	0.7	19.5
107.2	1	19.5	80.6	2.6	7.8	402.9	1.1	7.8	724.2	0.6	19.5	679.2	0.8	19.5
221.6	0.9	19.5	155.9	1.5	7.8	130.7	1.1	7.8	914.4	0.6	19.5	730.5	0.7	19.5
335.5	1.3	19.5	173.3	1.2	7.8	1394.3	0.7	7.8	1224.2	0.8	19.5	433.7	1.7	19.5
149.4	0.8	19.5	100.3	0.6	7.8	324.2	0.9	7.8	275.5	0.8	19.5	951	0.8	19.5
115.7	1.6	19.5	165.2	1	7.8	554.8	0.7	7.8	374.4	0.7	19.5	456.3	0.7	19.5
152.1	0.7	19.5	79.9	0.5	7.8	137.4	1.5	7.8	333.9	0.5	19.5	268.9	0.8	19.5
177.1	0.5	19.5	166.7	1.1	7.8	175.1	0.7	7.8	498.7	0.8	19.5	410.4	0.9	19.5
156.4	0.4	19.5	156.5	1.3	7.8	171.4	0.9	7.8	926.8	0.7	19.5	472.2	1.4	15.6
219.5	0.6	19.5	215.1	1.5	7.8	239.4	1.3	7.8	531.1	0.8	19.5	589.4	1.5	15.6
214.2	1	19.5	128.3	1.8	7.8	189.8	1.1	7.8	263.9	0.8	19.5	413.7	1.3	15.6
137.1	1.4	7.8	394.1	1.3	7.8	233.9	0.5	7.8	430.4	0.6	19.5	503.5	2.2	15.6
103	1.8	7.8	195	1.4	7.8	711	0.9	7.8	410.2	0.7	19.5	299.3	1.6	15.6
180	1	7.8	120.7	1.5	7.8	539.8	0.7	7.8	616.3	0.6	19.5	219.2	1.2	15.6
133.3	1.2	7.8	103.3	1.2	7.8	605	0.7	19.5	442	0.7	19.5	415.5	1	15.6
289.8	0.9	7.8	70.8	3.6	7.8	391.1	0.7	19.5	548.1	0.6	19.5	473.7	1.2	15.6
97.3	0.9	7.8	92.1	1.2	7.8	465.1	1.1	19.5	432.1	0.5	19.5	117.1	0.9	15.6
475.9	0.7	7.8	327.8	0.9	7.8	438.7	0.5	19.5	289	0.4	19.5	268.1	1	15.6
80.2	1.5	7.8	154.2	1.4	7.8	257.3	1	19.5	1305.9	0.5	19.5	800.2	0.6	15.6
133.9	0.9	7.8	197.6	1.1	7.8	367.2	0.9	19.5	279.5	0.8	19.5	1048.1	1.2	15.6
76.6	1.3	7.8	226.5	1	7.8	255.7	1	19.5	579.5	0.8	19.5	234.4	7.1	15.6
109.1	1	7.8	74.9	1.6	7.8	313.6	1	19.5	255.7	0.4	19.5	279.4	0.9	15.6
118.7	3.5	7.8	53.1	0.8	7.8	311.2	0.5	19.5	591.3	0.7	19.5	322.1	1.4	15.6
138	0.9	7.8	82.7	3.4	7.8	363.9	0.5	19.5	618.9	0.7	19.5	576.3	0.9	15.6
73.2	1.9	7.8	83	3.5	7.8	249.7	0.6	19.5	426	0.7	19.5	691.2	1	15.6
120.9	1.2	7.8	257.2	2	7.8	262.3	1.8	19.5	713.6	0.6	19.5	567	0.8	15.6
109.3	1.2	7.8	158.8	1.3	7.8	283.9	0.8	19.5	335.4	0.6	19.5	400.5	1.2	15.6
217.9	1.2	7.8	42.9	3.7	7.8	255.9	0.9	19.5	472.4	0.6	19.5	552	1.6	15.6
156.2	0.5	7.8	171.5	1.6	7.8	189.5	0.5	19.5	1042.5	0.4	19.5	322.4	0.8	15.6
113	0.8	7.8	137.4	0.6	7.8	331.2	0.3	19.5	320.9	0.8	19.5	712.6	1.1	15.6
126.7	1.4	7.8	368.7	1.4	7.8	218.5	0.5	19.5	357.3	0.6	19.5	561.7	1.1	15.6
159	1.5	7.8	291.9	1.7	7.8	281.1	0.6	19.5	245.6	1.1	19.5	625.6	1.1	15.6
80.6	1.1	7.8	225.6	1.2	7.8	208.2	0.5	19.5	341.2	0.9	19.5	375.4	1.7	15.6
114.9	0.8	7.8	245.4	1.4	7.8	250.7	0.3	19.5	800.3	0.7	19.5	602.9	1	15.6
89.2	1.6	7.8	172.6	1.1	7.8	191.2	1.2	19.5	540.6	0.7	19.5	1196.4	0.7	15.6
296.4	0.8	7.8	227.3	1	7.8	232.5	0.3	19.5	1724.7	0.7	19.5	298.2	0.9	15.6
70.6	1.7	7.8	319.2	1.4	7.8	432.2	0.6	19.5	744.6	1	19.5	560.6	1.3	15.6
137.7	1.9	7.8	241.9	1.2	7.8	310.6	0.5	19.5	553.5	0.7	19.5	348.7	1	15.6
92.1	1.6	7.8	156.1	1.5	7.8	215	0.7	19.5	405	0.8	19.5	406.2	1	15.6
122.2	1	7.8	179.8	1.8	7.8	251.6	0.4	19.5	280.6	0.7	19.5	471.1	0.9	15.6
273.4	1.3	7.8	169.6	1	7.8	343.7	0.4	19.5	716.8	0.6	19.5	1043.5	1.1	15.6
218.9	1.1	7.8	128.4	1	7.8	366.9	0.6	19.5	878.4	0.6	19.5	283.4	8.3	15.6
139.4	1.2	7.8	108.1	2	7.8	337	0.2	19.5				869.9	0.9	15.6
149.1	1.1	7.8	199.2	1.2	7.8	197.4	0.4	19.5				718.4	0.9	15.6
106.9	1.4	7.8	633	1.3	7.8	290	0.5	19.5				313.7	1.5	15.6
237.9	1	7.8	144.3	1.7	7.8	332.1	0.7	19.5				311.7	0.9	15.6
125.6	1.1	7.8	105.5	1.5	7.8	380	0.4	19.5				1423.5	0.8	15.6
81.4	1.1	7.8	157	1.1	7.8	359.2	0.5	19.5				835.5	0.7	15.6
182.5	0.7	7.8	143.5	1.5	7.8	729.7	16.5	19.5				678.5	1.4	15.6
159.6	0.9	7.8	159.6	1.4	7.8							1051.1	1.1	15.6
543.7	1.2	7.8	166.5	1.5	7.8							537.7	1.2	15.6
65.1	1.5	7.8	190.8	1.2	7.8							303.4	1.1	15.6
148.9	1.1	7.8	116.6	1.2	7.8							609.1	0.9	15.6
125.7	1.5	7.8	224.4	2.1	7.8							317.1	1.2	15.6
116	1.4	7.8	161.3	1.1	7.8							222	1.2	15.6
55.8	1.6	7.8	323.7	1.7	7.8							204.7	1.2	15.6
60	0.6	7.8	503.2	1.4	7.8							305.6	1.3	15.6
95.1	1.2	7.8	111.6	1	7.8							423	1	15.6
237.6	1.3	7.8	133.5	1.6	7.8							178	0.9	15.6
94.6	1.9	7.8	140.9	1.8	7.8							236.6	1.3	15.6
111.8	1.5	7.8	221.7	1.1	7.8							243.4	1.3	15.6
80.9	1.6	7.8	127.7	1.3	7.8							387.8	1.1	15.6
104.8	1.6	7.8	213.8	1.2	7.8							583.9	1.5	15.6
125.9	1.6	7.8	96.5	1.1	7.8							252.9	1	15.6
135.7	1.6	7.8	201.5	1.4	7.8							309.1	1.1	15.6
58.7	1.1	7.8	104.8	1.1	7.8							922.2	0.9	15.6
106.7	2.4	7.8	58.7	1.3	7.8							341.2	2.1	15.6
150.2	1.7	7.8	181.5	1.6	7.8							233.8	1.9	15.6
85.6	1.5	7.8	156.9	1.5	7.8							434.4	1.1	15.6
105.7	1.2	7.8	136.8	1.7	7.8							314.7	1.5	15.6
153.5	1.7	7.8	140.9	1.3	7.8							314.6	1.1	15.6
134.3	1.6	7.8	170.6	1.1	7.8							373.9	1	15.6
145.5	1.3	7.8	163.5	1.3	7.8							1034.4	0.9	15.6
118.7	1	7.8	204.1	0.9	7.8							647.4	1	15.6
129.5	1.1	7.8	105.9	3.1	7.8							936.1	1	15.6
741.9	1.4	7.8	306.1	1.1	7.8							410.2	1.8	15.6
73.8	1.6	7.8	187.3	1.2	7.8							421.4	1.1	15.6
147	1.5	7.8	109.1	1.9	7.8							281.5	1.3	15.6
252.9	0.4	7.8	156.7	1.2	7.8							438	1.3	15.6
135.7	1.1	7.8	158.9	1.4	7.8							324.7	1.1	15.6
217.7	1.4	7.8	144.4	1.6	7.8							199.7	1.2	15.6
151.2	1.3	7.8	177.1	1.8	7.8							315.6	0.8	15.6
376.7	1.6	7.8	112.1	0.9	7.8							291.7	1.4	15.6
204.1	1.2	7.8	212.7	1.4	7.8							747.2	0.8	15.6
627.7	1.6	7.8	176.9	1.4	7.8							321.3	1	15.6
151.1	1.3	7.8	190.5	1.1	7.8							249.6	0.9	15.6
120.1	1.4	7.8	126.6	1.9	7.8							414.2	1.2	15.6
295.7	1.3	7.8	92.1	1.5	7.8							465.4	1.4	15.6
197.8	1.1	7.8	75	1.7	7.8							800.2	1	15.6
138.7	1.3	7.8	219.2	1.6	7.8							488.8	1	15.6
453.9	1.6	7.8	189.5	1.6	7.8							380.6	7.6	15.6
384.8	1.7	7.8	123.7	0.6	7.8							394	1	15.6
695.2	1.2	7.8	106.6	1.4	7.8							744.6	1.1	15.6
133.1	1.6	7.8	179.7	0.9	7.8							820.3	1	15.6
101	1.1	7.8	198.6	1.6	7.8							970.2	0.9	15.6
125.3	1	7.8	103.2	2.3	7.8							502.8	1.1	15.6
204.4	1.2	7.8	226.3	1.3	7.8							618.2	1	15.6
95.8	1	7.8	138.4	1.7	7.8							368.5	1	15.6
171.2	1.7	7.8	178.5	1.5	7.8							111.1	1.4	15.6
65.7	1.8	7.8	93.6	1.4	7.8							706.7	1.3	15.6
90.7	1.1	7.8	398.7	1.6	7.8							814.4	1	15.6
48.9	2.1	7.8	684	1.6	7.8							870.3	0.8	15.6
86.1	1.4	7.8	450.5	1.5	7.8							508.5	0.8	15.6
101	0.8	7.8	199.2	1	19.5							612.1	1.2	15.6
71.6	1.4	7.8	203.1	0.5	19.5							331	1.4	15.6
144.2	0.8	7.8	176.1	1.1	19.5							336.8	1.1	15.6
66.5	1.5	7.8	296.5	0.4	19.5							619.2	1.1	15.6
107.5	1.1	7.8	326.5	0.9	19.5							203.5	1.4	15.6
71.3	1.9	7.8	140.4	1	19.5							447.3	1.1	15.6
133.7	1.3	7.8	377.1	0.7	19.5							235.1	1.1	15.6
63.4	1.7	7.8	179.3	0.9	19.5							429.1	1.2	15.6
67.6	1.6	7.8	174.9	0.9	19.5							669.3	1.1	15.6
169.4	1.3	7.8	229	1.2	19.5							1020.2	1.4	15.6
72.6	0.9	7.8	354.7	1.1	19.5							207.7	1.3	15.6
126.1	0.8	7.8	169.1	1.2	19.5							449.3	1.1	15.6
260.8	0.7	7.8	302.9	0.9	19.5							669.2	1.2	15.6
57.9	1.5	7.8	156	0.6	19.5							457.8	1.1	15.6
175	0.8	7.8	158.4	0.9	19.5							789.7	1.1	15.6
86.1	1.7	7.8	214	1.2	19.5							779.6	1.5	15.6
193.5	1.1	7.8	192.3	0.8	19.5							652.6	0.9	15.6
133.7	1.3	7.8	228.1	0.8	19.5							733.5	0.8	15.6
277.4	1.5	7.8	194	0.7	19.5							986.1	1.3	15.6
237.3	1.5	7.8	203.2	0.8	19.5							549.6	1.4	15.6
224.4	20.4	7.8	260.3	0.7	19.5							471.3	1.4	15.6
148.1	1.5	7.8	325.9	0.8	19.5							841.9	1	15.6
235	1.2	7.8	165.6	1.4	19.5							754.9	1.2	15.6
172.4	2.5	7.8	259.9	1	19.5							1033.5	0.9	15.6
94.6	1.7	7.8	191	0.6	19.5							595.5	0.8	15.6
298.5	1.6	7.8	181.6	0.5	19.5							1169.5	0.7	15.6
69.1	1.3	7.8	363.3	1	19.5							719.7	0.8	15.6
140.9	1.1	7.8	189.5	0.9	19.5							440.8	0.9	15.6
93.5	1.4	7.8	359.7	0.7	19.5							428.5	1.2	15.6
361.1	1.2	7.8	320.5	0.6	19.5							639.2	0.9	15.6
213.4	1.3	7.8	157.5	1	19.5							981.9	1	15.6
106	0.6	7.8	162.5	0.9	19.5							597.6	1.2	15.6
100.3	1.1	7.8	219.6	0.9	19.5							515.1	0.8	15.6
158.8	1.2	7.8	220.4	0.7	19.5							357.9	0.9	15.6
67.7	1.3	7.8	203.1	1	19.5							644.3	0.9	15.6
185	1.4	7.8	369.7	0.7	19.5							678.3	1.4	15.6
155.4	1.1	7.8	180.2	0.4	19.5							646.4	0.9	15.6
116.2	1.2	7.8	448.7	0.8	19.5							373.4	0.9	15.6
140.2	1.2	7.8	210.5	0.8	19.5							805.8	1.3	15.6
135.8	2.3	7.8	180.4	0.4	19.5							724.9	1.1	15.6
151	1.7	7.8	141.4	0.8	19.5							377.4	1.1	15.6
140.2	2	7.8										718.6	1	15.6
159.4	1.5	7.8										811.1	1.5	15.6
650	1.6	7.8										831.2	0.8	15.6
205.4	0.7	7.8										1952.8	1.1	15.6
114.6	2.1	7.8										299.1	1.1	15.6
219	1.5	7.8										1133.8	0.9	15.6
166.7	1.4	7.8										621.7	1	15.6
171.1	1.7	7.8										235.3	0.7	15.6
624.8	1.9	7.8										347.8	1	15.6
158.5	1.4	7.8										1921.2	0.7	15.6
184.8	1.4	7.8										1074.1	0.8	15.6
71.7	1.2	7.8										236.8	1.5	15.6
160.7	1.4	7.8										554.3	1.1	15.6
106.6	1.3	7.8										569.6	1.3	15.6
179	0.9	19.5										1207.5	1.1	15.6
168	0.7	19.5										375.4	1.3	15.6
198.6	0.5	19.5										574.9	1.1	15.6
129.8	0.7	19.5										489.5	2.1	15.6
259.2	0.7	19.5										836.7	0.6	15.6
287.8	0.8	19.5										310.3	1.7	15.6
111.7	0.7	19.5										268.4	1.1	15.6
206.3	0.9	19.5										1225.9	0.8	15.6
260.1	0.6	19.5										694.5	1	15.6
249.3	0.7	19.5										1433.3	0.8	15.6
119.2	1	19.5										1494.7	0.6	15.6
269.6	0.3	19.5										650.7	1.1	15.6
175.4	1	19.5										388	1.4	15.6
814.1	0.8	19.5										1243	0.8	15.6
288.6	1.1	19.5										460.2	1.2	15.6
455.4	0.9	19.5										1379.4	1	15.6
175.8	1.3	19.5										628.6	0.6	15.6
191.6	1	19.5										1094.4	0.5	15.6
241.7	1.5	19.5										484.6	0.5	15.6
166.8	0.6	19.5										1237.3	0.8	15.6
98.4	1.6	19.5										836.9	0.9	15.6
143.3	1.2	19.5										527.1	5.2	15.6
273.7	0.9	19.5										241.4	0.8	15.6
376.3	1	19.5										256.3	0.9	15.6
268	0.5	19.5										445.6	0.6	15.6
113.6	1.6	19.5										793.9	0.9	15.6
239.7	0.7	19.5										454	0.6	15.6
284	0.9	19.5										415	1.3	15.6
												480.5	1.7	15.6
												498	1.1	15.6
												465.9	1.1	15.6
												645.4	0.8	15.6
												751.5	4.3	15.6
												344.8	1.3	15.6
												402.2	1.1	15.6
												996.7	0.8	15.6
												620.3	8.1	15.6
												554.8	0.8	15.6
												281	0.9	15.6
												286	0.8	15.6
												337.4	1.1	15.6
												1745.6	0.8	15.6
												720.1	1	15.6
												345	1.4	15.6
												541.7	0.9	15.6
												497.8	1.3	15.6
												399.7	0.9	15.6
												471.2	1.1	15.6
												453.3	1.3	15.6
												555.6	1	15.6
												267.2	1	15.6
												1173.7	0.7	15.6
												590.6	1.1	15.6
												860.1	1	15.6
												236.1	1.3	15.6
												236.8	0.8	15.6
												712.7	0.8	15.6
												416.9	0.7	15.6
												302.1	0.9	15.6
												720.1	0.6	15.6
												447.2	0.6	15.6
												405.6	1	15.6
												625.3	1	15.6
												465.1	1.5	15.6
												1083.2	1.1	15.6
												914.4	1.1	15.6
												435.6	1.5	15.6
												329.3	1	15.6
												459	1	15.6
												517.1	1.5	15.6
												841.4	1	15.6
												558.4	0.8	15.6
												395.5	1.1	15.6
												700.2	1	15.6
												1160.3	0.9	15.6
												356.1	1.4	15.6
												901	0.7	15.6
												320.4	1.1	15.6
												501	0.9	15.6
												430.5	0.6	15.6
												572.5	1.1	15.6
												336.4	1.1	15.6
												397.5	1	15.6
												605	0.7	15.6
												388.1	6.9	15.6
												680.2	0.7	15.6
												875	0.8	15.6
												936.1	0.8	15.6
												271.3	0.7	15.6
												283.5	0.6	15.6
												305.5	0.9	15.6
												203.4	0.7	15.6
												345.3	0.7	15.6
												342.9	0.9	15.6
												795.8	8.1	15.6
												314.6	1.2	15.6
												164.9	0.9	15.6
												187.3	1.1	15.6
												384.4	1.3	15.6
												256.8	0.9	15.6
												789	0.5	15.6
												294.2	2.7	15.6
												324.8	0.9	15.6
												208.8	0.8	15.6
												287.4	0.8	15.6
												506.4	1.1	15.6
												339.3	3	15.6
												294.7	1	15.6
												658	1	15.6
												1555.6	1	15.6
												346.8	1.1	15.6
												813.1	2.4	15.6
												350.4	1.2	15.6
												701.1	0.7	15.6
												1707.8	0.9	15.6
												901.7	0.8	15.6
												950.4	0.9	15.6
												148.1	0.9	15.6
												941.4	1	15.6
												861.5	0.8	15.6
												642.5	1.3	15.6
												1404.7	0.6	15.6
												904.3	0.9	15.6
												500	1	15.6
												441.9	1.3	15.6
												2006.9	1.4	15.6
												1198.3	0.8	15.6
												636	7.3	15.6
												992.6	0.7	15.6
												563.5	0.8	15.6
												1793.1	1.1	15.6
												266.3	3.4	15.6
												664.2	1.4	15.6
												169.8	0.6	15.6
												635	0.7	15.6
												330.5	0.9	15.6
												479.1	1.2	15.6
												1030.3	0.9	15.6
												718.8	1.2	15.6
												352.2	1.1	15.6
												565.3	0.9	15.6
												600.6	0.9	15.6
												562.1	1.4	15.6
												1169.8	0.8	15.6
												1708.6	0.9	15.6
												594.5	1	15.6
												690.7	1	15.6
												1181	0.8	15.6
												169.4	0.8	15.6
												1136.6	0.8	15.6
												391.6	0.7	15.6
												383.5	1.4	15.6
												184.9	1.1	15.6

## Sheet: BNNT
S_3			P_3,S_2			P_2*,S_1			P_1*,S_0.5			P_0.5*
Length (nm)	Step height (nm)	Scale (nm/px)	Length (nm)	Step height (nm)	Scale (nm/px)	Length (nm)	Step height (nm)	Scale (nm/px)	Length (nm)	Step height (nm)	Scale (nm/px)	Length (nm)	Step height (nm)	Scale (nm/px)
194.7	1.6	19.5	195.3	12.8	19.5	231.4	3.7	19.5	533.1	4.1	19.5	1490.2	11.2	19.5
266.7	1	19.5	274.8	3.4	19.5	417.1	5.4	19.5	1122.2	11.7	19.5	972.4	11.5	19.5
317.7	4.5	19.5	120.8	8.8	19.5	210.4	6	19.5	853.3	11.2	19.5	675.7	12	19.5
163.2	2.8	19.5	296.2	1.9	19.5	287.8	5	19.5	780.5	7.8	19.5	558.2	3.6	19.5
115.8	4.2	19.5	209.2	5.5	19.5	343.9	5.6	19.5	871.4	4	19.5	614.6	4.5	19.5
145.7	1.9	19.5	207.3	3.2	19.5	239.6	3.2	19.5	691.4	5.5	19.5	591.5	1.1	19.5
199.1	1.1	19.5	218.7	3.5	19.5	589.7	8	19.5	498	5.5	19.5	4200.1	14	19.5
118.4	3.3	19.5	155.7	2.7	19.5	296.4	2.3	19.5	1011.5	0.8	19.5	282	4.3	19.5
186.2	1.5	19.5	430.6	0.7	19.5	428.4	5.8	19.5	695.5	10.2	19.5	220.3	0.6	19.5
358.6	0.8	19.5	288.1	0.7	19.5	497.2	8.2	19.5	745.8	9.8	19.5	319.1	0.7	19.5
307.9	1.1	19.5	313	1.1	19.5	213.2	8.9	19.5	690.9	4.5	19.5	277.8	0.9	19.5
235	0.7	19.5	339.8	2.5	19.5	332.6	3.5	19.5	733.6	5.3	19.5	359.2	0.8	19.5
112.9	1.3	19.5	357.6	0.8	19.5	371.3	2	19.5	415.4	3.4	19.5	904.3	3.9	19.5
159.1	0.9	19.5	386.6	1.2	19.5	276.2	2.8	19.5	507	4.4	19.5	544.5	6	19.5
265.8	0.9	19.5	150.6	1.2	19.5	463.9	1.5	19.5	1353.4	10.1	19.5	1288.5	9.6	19.5
122.4	2.7	19.5	179.3	4.7	19.5	592.2	2.3	19.5	820.5	13.2	19.5	502.5	12.3	19.5
115.9	0.8	19.5	195.3	0.9	19.5	620.3	5.4	19.5	522	12.8	19.5	546.6	4.4	19.5
80	1.2	19.5	164.9	1	19.5	353.6	2.2	19.5	944.8	5.3	19.5	958.2	8.8	19.5
35.9	3.7	19.5	240.1	1.1	19.5	352.1	2.1	19.5	580	5	19.5	300.5	1.9	19.5
228.7	0.5	19.5	331.9	2.7	19.5	421.3	2	19.5	405.6	6.5	19.5	467.7	1.6	19.5
124.6	1	11.7	243.2	0.7	19.5	374.7	1.9	19.5	463.2	5.2	19.5	198.7	1.4	19.5
155.2	1.5	11.7	159.4	3.3	19.5	617.6	2.3	19.5	821.9	6.6	19.5	305	0.9	19.5
138.8	2.6	11.7	137.8	4	19.5	610.5	15.6	19.5	1046	4	19.5	370.3	0.8	19.5
215.3	1	11.7	229.3	0.9	19.5	405.7	16.5	19.5	440.1	5.9	19.5	377.1	1.3	19.5
131.2	1.8	11.7	164.2	2.1	11.7	402.6	6.1	19.5	1465	5.6	19.5	257.9	0.9	19.5
153.2	1.6	11.7	114.1	4	11.7	369.6	2.6	19.5	1310.9	6.8	19.5	253.4	0.8	19.5
228.4	1	11.7	259.9	3	11.7	376.9	4	19.5	1278.4	6.7	19.5	191.7	0.9	19.5
142.7	2.6	11.7	134.3	1.7	11.7	351.9	3.6	19.5	351	10	19.5	203.7	1.1	19.5
450	3.3	11.7	201.4	1.9	11.7	372.3	2.4	19.5	501.2	5.5	19.5	236.8	1	19.5
76.3	1.4	11.7	110.5	3.8	11.7	310.7	4.4	19.5	485.1	9.2	19.5	391.4	0.5	19.5
111.5	1.2	11.7	122.1	2.5	11.7	305.5	3.5	19.5	722.5	5.2	19.5	384	0.8	19.5
354.1	0.9	11.7	217.1	2.8	11.7	290.2	1.9	19.5	449.8	7.1	19.5	179.6	1.4	19.5
75.4	2.1	11.7	165.4	2.7	11.7	358.1	2.1	19.5	562.4	5.8	19.5	357.2	1.5	19.5
100.6	0.9	11.7	155.7	1.1	11.7	785.2	1.8	19.5	469.6	4.6	19.5	364.6	1.2	19.5
114	1	11.7	123.9	7.9	11.7	298.5	4.1	19.5	898.5	6.7	19.5	191.6	1.3	19.5
108.6	1.4	11.7	132	3	11.7	325.9	2	19.5	475.6	5	19.5	182.1	1.4	19.5
94.8	1.3	11.7	152.3	3.2	11.7	420.4	2.2	19.5	553.5	6.3	19.5	317.9	0.7	19.5
143.3	1.2	11.7	182.3	3.1	11.7	799.7	3.8	19.5	475.2	4.5	19.5	172.4	1.1	19.5
135.1	1.7	11.7	142.3	3.5	11.7	510.8	8.7	19.5	359.1	2.5	19.5	205.1	5.4	19.5
172.8	1.7	11.7	270.1	1.2	11.7	442.8	3.8	19.5	421.6	18.1	19.5	816.9	9.6	19.5
159	1.2	11.7	132.2	3	11.7	458.9	3	19.5	228.8	5.1	19.5	307.4	3.1	19.5
173.8	1	11.7	88.5	4.8	11.7	346.8	3.3	19.5	550.4	6.6	19.5	697.5	7.4	19.5
145.9	1.4	11.7	141.4	1.7	11.7	453	3.5	19.5	1298.5	3.1	19.5	276	24.1	19.5
169.8	1.2	11.7	162.5	1.5	11.7	331.3	4.2	19.5	1720.5	26.3	19.5	1802.6	16.5	19.5
97.7	2.7	11.7	202.6	1.1	11.7	642.4	4.3	19.5	2074.8	21.7	19.5	459.5	11.8	19.5
157.2	12.5	11.7	117.7	3.7	11.7	371.1	2.2	19.5	575.1	7	19.5	411.2	4.4	19.5
136.2	1.2	11.7	183.7	3.2	11.7	481.1	2	19.5	744.9	4.6	19.5	1329.9	11.9	19.5
139.2	0.8	11.7	221.3	1.9	11.7	445.8	11.7	19.5	676.9	6.5	19.5	666.6	5.4	19.5
230.8	0.5	11.7	376.1	1.4	11.7	436.7	13.2	19.5	414.6	7.6	19.5	319.1	3.1	19.5
137.7	1.3	11.7	168.7	1.5	11.7	332	9.9	19.5	678.7	6.9	19.5	779.5	10.5	19.5
111.2	1.2	11.7	272.6	1.4	11.7	377.2	6	19.5	589.7	4	19.5	470.5	3.2	19.5
186.5	1.4	11.7	229	1.1	11.7	274.7	6.3	19.5	630.9	3.8	19.5	429.7	2.2	19.5
156.8	2.6	11.7	178.6	1.6	11.7	425.9	3	19.5	551.4	5.1	19.5	233.8	1.7	19.5
71	5.6	11.7	244.6	1.4	11.7	386.1	2.8	19.5	471.1	6	19.5	197.7	1.6	19.5
38.5	0.8	11.7	149.3	1.9	11.7	230.3	5.3	19.5	426.4	5.8	19.5	272.2	1.3	19.5
274.1	1.7	11.7	166.1	7	11.7	441.7	6.4	19.5	650.4	10.9	19.5	655.4	9.5	19.5
189.6	0.3	11.7	364.9	1.5	11.7	504	2.6	19.5	348.1	5.3	19.5	273.7	4.8	19.5
99.2	1	11.7	210.8	1.3	11.7	404.9	3.6	19.5	531.4	6.6	19.5	340.5	2.4	19.5
128.2	1.8	11.7	106	1.4	11.7	223.6	6.8	19.5	354.5	5.6	19.5	204.8	0.8	19.5
148.5	1.5	11.7	149.2	1.7	11.7	277.6	6.6	19.5	368.5	3.4	19.5	165.5	1.1	19.5
136.6	1.5	11.7	119.3	2.5	11.7	298.8	5.1	19.5	598	4.3	19.5	979.5	5.8	19.5
124	1.8	11.7	95.2	4.1	11.7	244.1	6	19.5	455.9	4.6	19.5	847.6	8.8	19.5
157.2	1.5	11.7	118.5	3.4	11.7	284.6	6.1	19.5	566.3	3.8	19.5	907.2	9.6	19.5
191.5	1.3	11.7	104.3	2.1	11.7	318	4.5	19.5	1809.4	13.9	19.5	818.4	6.8	19.5
131.9	2	11.7	56.2	2.3	11.7	314.9	7	19.5	620.6	4.4	19.5	1398.4	13.4	19.5
184.5	1.7	11.7	135.9	3	11.7	440.6	4.1	19.5	804.9	9.7	19.5	904.1	14.8	19.5
157.8	1.9	11.7	117.5	9.3	11.7	679.3	1.8	19.5	725.7	4.4	19.5	252.5	5.1	19.5
137.1	1.7	11.7	200.4	1.5	11.7	352.7	4.2	19.5	467.7	2.4	19.5	575.2	7.6	19.5
193	1.2	11.7	152.2	5.9	11.7	360.4	3	19.5	601.7	8.1	19.5	260.9	0.9	19.5
196.1	2.1	11.7	413.1	1.7	11.7	368.4	1.7	19.5	659.1	6	19.5	410.4	2.7	19.5
100.7	1.5	11.7	164.8	3.3	11.7	505.9	2.1	19.5	632.6	5	19.5	573.9	6.9	19.5
74.1	2.1	11.7	373.6	2.9	11.7	536.3	3	19.5	596.7	8.5	19.5	329.9	11	19.5
51.4	1.3	11.7	220.6	2.2	11.7	406.7	7.8	19.5	349.4	3.9	19.5	385.4	5.4	19.5
146	1.4	11.7	174.9	1.5	11.7	348.4	3.4	19.5	503.3	5	19.5	164.3	3.9	19.5
118.1	5.5	11.7	246.6	1.5	11.7	332.6	15	19.5	377.9	3	19.5	278	1.5	19.5
383.8	5.1	11.7	306.4	1.5	11.7	394.1	3.4	19.5				151.3	1.7	19.5
92	1.8	11.7	215.6	2.3	11.7	472.4	3.1	19.5				215.4	1.2	19.5
200.3	1.1	7.8	134.5	3.1	11.7	514.6	2.1	19.5				475.8	1.2	19.5
93.1	1.3	7.8	106.9	7.7	11.7	505.5	0.9	19.5				732.7	4.8	19.5
118.1	2.7	7.8	76.2	6.3	11.7	553.9	2.3	19.5				190.6	3.7	19.5
118.4	1.7	7.8	283.8	1.6	11.7	554.8	1.7	19.5				877	5	19.5
100.7	0.9	7.8	137.8	5.8	11.7	904.4	8.9	19.5				221.7	1.2	19.5
79.4	0.7	7.8	175	5.7	11.7	524.1	17.3	19.5				203.9	1.3	19.5
75.2	1.1	7.8	249.5	8.1	11.7	644.3	1.6	19.5				174.6	1.7	19.5
53	3.1	7.8	242.9	1.6	11.7	439.7	1.1	19.5				751.9	4.6	19.5
41.9	1.3	7.8	86.2	1.8	11.7	360.7	3.1	19.5				966.1	7.4	19.5
86	1.2	7.8	210.2	1.2	11.7	244.4	3	19.5				642.7	7.6	19.5
72.7	5.2	7.8	115.4	1.1	11.7	374.3	2.2	19.5				1353.7	8.5	19.5
43.7	1.8	7.8	152.7	3	11.7	449.6	0.5	19.5				1147.4	9.7	19.5
45.3	2.9	7.8	226.9	2.8	11.7	612.5	0.7	19.5				489.7	7.9	19.5
95.2	0.8	7.8	124.7	1.7	11.7	598.8	0.6	19.5				674.2	1.6	19.5
102.5	1.3	7.8	195.6	4.5	11.7	485.4	1.2	19.5				268.8	1.2	19.5
96.5	0.6	7.8	217.5	2.1	11.7	450.2	0.8	19.5				1704.2	8.6	19.5
85.7	0.7	7.8	362.4	2.7	11.7	461	0.5	19.5				1011.9	11.6	19.5
96.1	2.7	7.8	166	7.5	11.7	333.8	0.7	19.5				623.6	13.6	19.5
167.1	1.2	7.8	210.5	2.2	11.7	333.8	1.1	19.5				1617.6	6.5	19.5
45.1	1	7.8	183.1	2.3	11.7							576.7	9.7	19.5
180.8	0.9	7.8	163	3.4	11.7							1036.8	11.8	19.5
208.2	1.6	7.8	199.3	1.2	11.7							254.3	1.2	19.5
110	1.5	7.8	128.6	3.4	11.7							268.6	0.8	19.5
79.5	4.2	7.8	151.1	2.5	11.7							295.9	1.3	19.5
70.9	2.6	7.8	150.4	3.9	11.7							287.1	1	19.5
136.5	0.9	7.8	208.3	2.5	11.7							197.9	0.9	19.5
72.3	3.1	7.8	413.4	1.2	11.7							394.2	1	19.5
142.1	1.5	7.8	208.6	4.5	11.7							1243.4	12.9	19.5
74.4	0.9	7.8	111	9.9	11.7							226.8	1	19.5
122.1	2.6	7.8	153.1	7.9	11.7							436.2	3.5	19.5
109	2.6	7.8	145	1.8	11.7							1478.6	9.8	19.5
168.5	1.4	7.8	143.8	7.1	11.7							202.1	1.6	19.5
240.5	1.9	7.8	165.7	9	11.7							149.2	1.8	19.5
92.4	1	7.8	167.6	8	11.7							241	1.2	19.5
123.2	1.2	7.8	182.3	3.4	11.7							375.5	0.8	19.5
71.5	7.3	7.8	182.8	3.3	11.7							271.1	1.5	19.5
159.9	1.7	7.8	140.3	4.6	11.7							238.4	2.3	19.5
89.7	1.5	7.8	188	8	11.7							304.2	1.4	19.5
82.3	1.9	7.8	148.3	3.6	11.7							267.9	1.4	19.5
124.7	1.2	7.8	218.9	3.6	11.7							184.6	1.1	19.5
57.7	1.4	7.8	87.5	4	11.7							187.8	1.4	19.5
87.6	0.9	7.8	125.4	4.9	11.7							262.7	1.2	19.5
121.6	1.8	7.8	140.5	6.2	11.7							476.4	0.8	19.5
176.6	3.7	7.8	144.7	2.7	11.7							1054.9	10.4	19.5
76.7	3.5	7.8	178.8	3.1	11.7							84	9.5	19.5
159.6	3.2	7.8	161.2	3.6	11.7							195	2.3	19.5
217.5	1.4	7.8	168	4.1	11.7							713.4	8.7	19.5
69.8	5.4	7.8	171.2	2.8	11.7							323.6	10.2	19.5
128.9	0.9	7.8	223.4	3.2	11.7							600.4	7.2	19.5
93.1	0.7	7.8	135.1	1.8	11.7							338.1	2.2	19.5
84.9	1.1	7.8	235	1	11.7							160.5	4.3	19.5
135.6	1.3	7.8	181	1.4	11.7							320.4	0.6	19.5
65.3	1.4	7.8	125.1	3.6	11.7							223.2	0.6	19.5
75.8	0.8	7.8	125.2	6.2	11.7							265.8	0.5	19.5
147.3	0.8	7.8	273	2.7	11.7							1160.6	8.4	19.5
132.1	1.5	7.8	193.6	10.2	11.7							987.7	5.4	19.5
116.4	1.6	7.8	160.1	1.3	11.7							436.4	5.7	19.5
115.7	1.2	7.8	106.2	2.4	11.7							584.9	8.7	19.5
264.6	0.6	7.8	407.3	1.2	11.7							964.9	10.6	19.5
87	1.2	7.8	162.4	1.2	11.7							1125.3	2.2	19.5
47.8	0.7	7.8	294.9	0.7	11.7							775.5	2.3	19.5
58.9	1.2	7.8	180.4	4.5	11.7							697.3	6.5	19.5
62.6	1.4	7.8	172.6	3.6	11.7							1298.1	14.7	19.5
118.7	0.7	7.8	197.7	4.1	11.7							834.7	9.5	19.5
87.6	0.8	7.8	373.8	2.3	11.7							343.6	2.6	19.5
131.6	1.6	19.5	183.9	1.1	11.7							291.2	0.5	19.5
141.5	2.1	19.5	156.3	1.8	7.8							160.3	0.9	19.5
169.8	1.5	19.5	138	3	7.8							222.2	1.1	19.5
210	2.3	19.5	153.5	2.4	7.8							202	1	19.5
158.1	1.8	19.5	165.7	2.1	7.8							140.9	0.7	19.5
185.7	0.8	19.5	136.9	0.8	7.8							375.1	1.6	19.5
112.6	1.1	19.5	74.1	4.3	7.8							297.8	0.9	19.5
231	3.1	19.5	207.4	4.7	7.8							587.6	4.7	19.5
210.8	0.5	19.5	163.6	2.8	7.8							291.6	6.8	19.5
360	0.4	19.5	78	4.1	7.8							631.1	2.6	19.5
193.4	0.8	19.5	109.8	2.5	7.8							1007.9	14.4	19.5
173.4	0.3	19.5	227.9	2.9	7.8							241.2	1.4	19.5
245.5	2.5	19.5	137.3	2.1	7.8							1465.5	10.8	19.5
			123.6	3.6	7.8							265.1	0.6	19.5
			119.3	3.5	7.8							263.2	0.4	19.5
			137.5	3.3	7.8							56.9	1.2	19.5
			80.2	11.7	7.8							353	1	19.5
			96.5	6.2	7.8							142.6	0.9	19.5
			121.6	2.6	7.8							411.6	0.6	19.5
			151.2	3.3	7.8							857.2	4.2	15.6
			227	3.2	7.8							338.3	0.6	15.6
			85.7	2.2	7.8							426.1	4.5	15.6
			116.4	4.1	7.8							566.5	5.1	15.6
			100.9	3.6	7.8							1056.9	13.9	15.6
			199.6	3.6	7.8							426.8	1	15.6
			140.9	4	7.8							740	7.4	15.6
			99.8	4.2	7.8							386.3	0.9	15.6
			184.5	2.5	7.8							832.9	9.3	15.6
			158.8	3.9	7.8							682.5	3.6	15.6
			152.6	1.7	7.8							691.9	0.8	15.6
			155.6	4.6	7.8							545.7	0.6	15.6
			161.3	2	7.8							347.9	0.9	15.6
			122.9	7.8	7.8							506.5	9.8	15.6
			156.3	4.9	7.8							704.2	11.1	15.6
			154.6	4.8	7.8							253.4	10.4	15.6
			147.6	2.7	7.8							757.1	6.8	15.6
			101.3	2.3	7.8							1188.5	8.7	15.6
			121.9	4.8	7.8							683.1	0.7	15.6
			142.1	5.1	7.8							471.2	12.6	15.6
			283.1	2.6	7.8							380.3	3.4	15.6
			177.3	3.9	7.8							554.1	3.8	15.6
			107.7	13.2	7.8							173.9	1	15.6
			142.1	1.3	7.8							330.3	0.6	15.6
			239.5	6.1	7.8							231.3	1.3	15.6
			92.9	3	7.8							478.4	0.8	15.6
			137.2	4.8	7.8							161.7	0.7	15.6
			153.8	7.5	7.8							168.9	0.8	15.6
			188.2	2.5	7.8							271	0.9	15.6
			141	8.1	7.8							284.3	0.7	15.6
			127.7	4.4	7.8							2775.1	15.5	15.6
			144.2	5.2	7.8							501.1	6	15.6
			134.1	4.5	7.8							429	18.8	15.6
			186.1	1.2	7.8							281.8	28.6	15.6
			69.1	3.4	7.8							120.2	0.7	15.6
			160.2	6.6	7.8							109.7	0.6	15.6
			113.5	5.3	7.8							131.2	0.9	15.6
			132	7.3	7.8							127.6	0.8	15.6
			126.9	3.1	7.8							660.2	3.1	15.6
			139.1	2.2	7.8							430.4	23.7	15.6
			178.3	5.6	7.8							182.8	0.7	15.6
			76.1	1.4	7.8							457.4	3.5	15.6
			101.9	6.9	7.8							163.1	0.7	15.6
			125.2	5.1	7.8							444.5	3.4	15.6
			117.5	6.6	7.8							129.7	1.3	15.6
			416.1	2.5	7.8							559	3.9	15.6
			87.4	11.8	7.8							944.1	9	15.6
			196.8	4.8	7.8							442.6	1.2	15.6
			99.6	11.4	7.8							682.1	4	15.6
			253.6	6.4	7.8							302	12.2	15.6
			217.3	1.8	7.8							288.7	4.3	15.6
			124.6	5.8	7.8							1136.9	10.5	15.6
			121.2	3	7.8							853.1	6.4	15.6
			127.2	2.5	7.8							365.5	13.2	15.6
			224.9	1.3	7.8							503.9	14.3	15.6
			123.4	3.2	7.8							960.3	9.3	15.6
			586.8	1.2	7.8							536.4	16.5	15.6
			333.3	1.1	7.8							1670.6	13.5	15.6
			199.2	3.3	7.8							326.4	5.5	15.6
			181.8	4.3	7.8							396.8	6.5	15.6
			181.8	4.4	7.8							545.2	5.6	15.6
			160.8	1.3	7.8							989.8	6.2	15.6
			136.9	3.7	7.8							985.3	5.5	15.6
			112.5	1.3	7.8							661.3	1	15.6
			196	8.1	7.8							647.2	1.1	15.6
			128.2	2.1	7.8							279.7	0.8	15.6
			304	7.8	7.8							228.7	1.1	15.6
			63.3	1	7.8							487.1	7.1	15.6
			138.8	4.2	7.8							225.4	3	15.6
			138.1	4.2	7.8							246.4	1	15.6
			117.4	6.8	7.8							125.8	2.1	15.6
			144.7	1.6	7.8							173.8	4.8	15.6
			121.5	3.9	7.8							144.5	1.1	15.6
			101.6	10.4	7.8							455	1	15.6
			117.1	8	7.8							1502.7	0.7	15.6
			132.5	3	7.8							1034	1.1	15.6
			96	2.5	7.8							770.3	1.1	15.6
			214.2	3.1	7.8							158.9	1.1	15.6
			140.4	3.2	7.8							564.5	1.1	15.6
			126	4.8	7.8							1601.8	0.7	15.6
			107.6	4.8	7.8							202.6	1.1	15.6
			248.7	3	7.8							262.2	0.9	15.6
			103.6	7.5	7.8							969.7	0.9	15.6
			130.3	7.9	7.8							150.8	0.7	15.6
			77.7	4.6	7.8							310.1	0.8	15.6
			125.4	9.7	7.8							707.7	5.6	15.6
			137.3	2.6	7.8							726.4	5.1	15.6
			150.8	4.3	7.8							188	0.7	15.6
			167.6	8.3	7.8							173.5	0.9	15.6
			153.7	2.4	7.8							384.4	5.1	15.6
			87	7.1	7.8							2210.8	14	15.6
			90.1	2.4	7.8							833.5	6.8	15.6
			223.7	1.9	7.8							811.8	1	15.6
			125.7	4.8	7.8							495.1	0.8	15.6
			109	7.4	7.8							608.9	5.3	15.6
			159.8	3	7.8							192.3	0.9	15.6
			110.3	2.6	7.8							687.7	4.9	15.6
			128.7	4.4	7.8							476.6	5.3	15.6
			154.5	4.8	7.8							302.3	0.9	15.6
			170.2	9.8	7.8							515.8	5.4	15.6
			116.6	12.6	7.8							400.6	0.9	15.6
			106.1	3.4	7.8							793.1	3.5	15.6
			170.5	2.8	7.8							284.3	1.2	15.6
			155.5	1.7	7.8							375.5	1.3	15.6
			117.9	3.8	7.8							153.8	0.5	15.6
			108.6	2.2	7.8							158.8	1.9	15.6
			122.5	6.4	7.8							269.6	0.6	15.6
			145.1	2	7.8							551.9	0.9	15.6
			134.5	3.4	7.8							415.9	1.1	15.6
			264.8	3.1	7.8							179.3	1	15.6
			202.9	3.3	7.8							146.1	1.1	15.6
			107.2	4.1	7.8							148.8	1.2	15.6
			136.5	9.2	7.8							254.1	1.3	15.6
			103.4	1.2	7.8							150.6	0.7	15.6
			113.6	2.7	7.8							458.1	0.9	15.6
			141.1	1.9	19.5							318.8	1.4	15.6
			183.4	1.7	19.5							134	0.7	15.6
			217.3	2.5	19.5							231	0.6	15.6
			304.3	1	19.5							312.8	0.8	15.6
			242.9	0.8	19.5							298.4	0.5	15.6
			228.3	1.7	19.5							678.7	6.8	15.6
			189.6	4.3	19.5							976.8	8.9	15.6
			361.6	2.5	19.5							360.8	1	15.6
			211.2	2	19.5							121.2	1.3	15.6
			189.2	0.7	19.5							235.2	0.7	15.6
			157	0.7	19.5							265.1	7	15.6
			152.2	0.4	19.5							934	6.3	15.6
			217.5	0.5	19.5							166.7	1.5	15.6
			343.5	0.8	19.5							244	0.7	15.6
			200.9	0.7	19.5							787.7	8.2	15.6
			307.4	0.6	19.5							1135	0.6	15.6
			253.7	0.5	19.5							194	0.6	15.6
			302.8	0.7	19.5							781.4	20.6	15.6
			273.2	0.9	19.5							306.3	0.6	15.6
												1068.6	9.8	15.6
												450.3	0.8	15.6
												176.6	0.6	15.6
												307.7	1	15.6
												168.1	0.8	15.6
												204.4	0.5	15.6
												319.9	0.5	15.6
												137.1	1.7	15.6
												153.5	0.9	15.6
												253.7	1.1	15.6
												636.6	9.1	15.6
												231.3	0.7	15.6
												342.4	1.2	15.6
												801.6	13.8	15.6
												286.8	0.7	15.6
												179.3	0.5	15.6
												200.4	0.7	15.6
												265	0.5	15.6
												140.1	1.1	15.6
												164.2	0.7	15.6
												382.7	3.7	15.6
												805.7	6.7	15.6
												1132.5	7.9	15.6
												982	7.6	15.6
												1283	9.6	15.6
												281.6	1.1	15.6
												742.8	5.5	15.6
												344.5	1.2	15.6
												476.4	1	15.6
												809.9	1	15.6
												318.5	9.7	15.6
												834	0.9	15.6
												1279.9	8.1	15.6
												445.6	3.1	15.6
												246.2	1.3	15.6
												202.2	1.4	15.6
												113.2	0.8	15.6
												260.1	0.8	15.6
												860.9	7.1	15.6
												946.7	9.1	15.6
												420.4	0.8	15.6
												883.9	1.1	15.6
												474	1.1	15.6
												286.6	1	15.6
												273.8	1.2	15.6
												187.4	1.2	15.6
												204.5	0.9	15.6
												621.3	0.8	15.6
												302.4	1.2	15.6
												234.3	0.5	15.6
												313.3	1.1	15.6
												171.9	0.7	15.6
												393.1	0.6	15.6
												253.5	0.6	15.6
												220.8	1.1	15.6
												295.7	0.8	15.6
												398.8	0.8	15.6
												285.8	0.8	15.6
												680.3	0.9	15.6
												533.8	3.5	15.6
												187.1	0.9	15.6
												220.6	1.5	15.6
												180.2	3.7	15.6
												881	0.8	15.6
												230.2	0.9	15.6
												154	1.3	15.6
												1017.9	6.7	15.6
												864.3	8.7	15.6
												919.2	9.9	15.6
												968.3	12.8	15.6
												478	1.4	15.6
												165.6	2.3	15.6
												1438.8	9	15.6
												503.4	6.1	15.6
												502.5	1.1	15.6
												1216	10.9	15.6
												580.9	0.8	15.6
												244.6	2.1	15.6
												153.7	1.4	15.6
												468.1	1	15.6
												865.3	1.6	15.6
												120.2	1.3	15.6
												152.1	1	15.6
												140	1.3	15.6
												578.8	0.9	15.6
												450.9	4.9	15.6
												615.5	6.4	15.6
												181	1.3	15.6
												142.4	1.8	15.6
												379.1	1.5	15.6
												474.5	1	15.6
												194.4	1.1	15.6
												190.8	1.1	15.6
												136.4	0.8	15.6
